# Supplementary material for: Transcriptomic Reprograming of Xanthomonas campestris pv. campestris after Treatment with Hydrolytic Products Derived from Glucosinolates
Source: MDPI journal article supplement (doi:10.3390/plants10081656), 2021-08-11
Supplement: s1 [file s1]

| List of up-regulated DEGs in the comparison AITCvsControl |                                                                                                                                                                          |        |        |
|-----------------------------------------------------------|--------------------------------------------------------------------------------------------------------------------------------------------------------------------------|--------|--------|
| Gene                                                      | Description                                                                                                                                                              | fdr    | log2fc |
| speA                                                      | sp Q8P448 SPEA_XANCP Biosynthetic arginine decarboxylase OS=Xanthomonas campestris pv. campestris (strain ATCC 33913 / NCPPB 528 / LMG 568) GN=speA PE=3 SV=2            | 0.0307 | 1.7199 |
| sodC1                                                     | sp O67149 SODC1_AQUAE Superoxide dismutase [Cu-Zn] 1 OS=Aquifex aeolicus (strain VF5) GN=sodC1 PE=3 SV=1                                                                 | 0.0393 | 1.7619 |
| rne                                                       | tr Q5GY94 Q5GY94_XANOR Ribonuclease E OS=Xanthomonas oryzae pv. oryzae (strain KACC10331 / KXO85) GN=rne PE=3 SV=1                                                       | 0.0480 | 1.7895 |
| rplB                                                      | sp Q9PE73 RL2_XYLFA 50S ribosomal protein L2 OS=Xylella fastidiosa (strain 9a5c) GN=rplB PE=3 SV=1                                                                       | 0.0294 | 1.8293 |
| fadJ                                                      | sp Q5QXM1 FADJ_IDILO Fatty acid oxidation complex subunit alpha OS=Idiomarina loihiensis (strain ATCC BAA-735 / DSM 15497 / L2-TR) GN=fadJ PE=3 SV=1                     | 0.0434 | 1.8468 |
| ispH                                                      | sp Q3BW40 ISPH_XANC5 4-hydroxy-3-methylbut-2-enyl diphosphate reductase OS=Xanthomonas campestris pv. vesicatoria (strain 85-10) GN=ispH PE=3 SV=1                       | 0.0298 | 1.8895 |
| glgX                                                      | sp Q3YW94 GLGX_SHISS Glycogen debranching enzyme OS=Shigella sonnei (strain Ss046) GN=glgX PE=3 SV=1                                                                     | 0.0407 | 1.9060 |
| SERP0500                                                  | sp Q5HQP8 Y500_STAEQ UPF0051 protein SERP0500 OS=Staphylococcus epidermidis (strain ATCC 35984 / RP62A) GN=SERP0500 PE=3 SV=1                                            | 0.0229 | 1.9394 |
| sodC2                                                     | sp O66602 SODC2_AQUAE Superoxide dismutase [Cu-Zn] 2 OS=Aquifex aeolicus (strain VF5) GN=sodC2 PE=3 SV=1                                                                 | 0.0436 | 1.9460 |
| ychF                                                      | sp Q7VMI2 YCHF_HAEDU Ribosome-binding ATPase YchF OS=Haemophilus ducreyi (strain 35000HP / ATCC 700724) GN=ychF PE=3 SV=3                                                | 0.0449 | 1.9735 |
| Alvin_0064                                                | sp P45373 Y064_ALLVD Uncharacterized protein Alvin_0064 OS=Allochromatium vinosum (strain ATCC 17899 / DSM 180 / NBRC 103801 / NCIMB 10441 / D) GN=Alvin_0064 PE=4 SV=1  | 0.0449 | 1.9768 |
| dxr                                                       | sp B0RW72 DXR_XANCB 1-deoxy-D-xylulose 5-phosphate reductoisomerase OS=Xanthomonas campestris pv. campestris (strain B100) GN=dxr PE=3 SV=1                              | 0.0094 | 1.9779 |
| XCC0317                                                   | tr Q8PDL8 Q8PDL8_XANCP Uncharacterized protein OS=Xanthomonas campestris pv. campestris (strain ATCC 33913 / NCPPB 528 / LMG 568) GN=XCC0317 PE=4 SV=1                   | 0.0216 | 1.9941 |
| XCC1489                                                   | tr Q8PAJ4 Q8PAJ4_XANCP Uncharacterized protein OS=Xanthomonas campestris pv. campestris (strain ATCC 33913 / NCPPB 528 / LMG 568) GN=XCC1489 PE=4 SV=1                   | 0.0273 | 2.0018 |
| guaA                                                      | sp Q8P8Q6 GUAA_XANCP GMP synthase [glutamine-hydrolyzing] OS=Xanthomonas campestris pv. campestris (strain ATCC 33913 / NCPPB 528 / LMG 568) GN=guaA PE=3 SV=1           | 0.0449 | 2.0161 |
| yrhE                                                      | sp Q795Y4 FDHL_BACSU Putative formate dehydrogenase YrhE OS=Bacillus subtilis (strain 168) GN=yrhE PE=3 SV=1                                                             | 0.0185 | 2.0240 |
| PSPPH_2483                                                | sp Q48IV1 LOVHK_PSE14 Blue-light-activated protein OS=Pseudomonas syringae pv. phaseolicola (strain 1448A / Race 6) GN=PSPPH_2483 PE=3 SV=2                              | 0.0194 | 2.0372 |
| dnaA                                                      | sp Q8PEH5 DNAA_XANCP Chromosomal replication initiator protein DnaA OS=Xanthomonas campestris pv. campestris (strain ATCC 33913 / NCPPB 528 / LMG 568) GN=dnaA PE=3 SV=1 | 0.0449 | 2.0374 |

|         |                                                                                                                                                                               |        |        |
|---------|-------------------------------------------------------------------------------------------------------------------------------------------------------------------------------|--------|--------|
| malQ    | tr B0RMT9 B0RMT9_XANCB MalQ protein OS=Xanthomonas campestris pv. campestris (strain B100) GN=malQ PE=4 SV=1                                                                  | 0.0441 | 2.0541 |
| araJ    | tr Q8PB10 Q8PB10_XANCP MFS transporter OS=Xanthomonas campestris pv. campestris (strain ATCC 33913 / NCPPB 528 / LMG 568) GN=araJ PE=4 SV=1                                   | 0.0369 | 2.0608 |
| yagR    | tr Q8P786 Q8P786_XANCP Oxidoreductase OS=Xanthomonas campestris pv. campestris (strain ATCC 33913 / NCPPB 528 / LMG 568) GN=yagR PE=4 SV=1                                    | 0.0297 | 2.0653 |
| phaF    | tr Q8PAA2 Q8PAA2_XANCP Poly(Hydroxyalcanoate) granule associated protein OS=Xanthomonas campestris pv. campestris (strain ATCC 33913 / NCPPB 528 / LMG 568) GN=phaF PE=4 SV=1 | 0.0410 | 2.0683 |
| ligD    | sp A0R3R7 LIGD_MYCS2 Multifunctional non-homologous end joining protein LigD OS=Mycobacterium smegmatis (strain ATCC 700084 / mc(2)155) GN=ligD PE=1 SV=2                     | 0.0401 | 2.0777 |
| corA    | sp Q9WZ31 CORA_THEMA Magnesium transport protein CorA OS=Thermotoga maritima (strain ATCC 43589 / MSB8 / DSM 3109 / JCM 10099) GN=corA PE=1 SV=1                              | 0.0449 | 2.1074 |
| htpG    | sp Q4UVY7 HTPG_XANC8 Chaperone protein HtpG OS=Xanthomonas campestris pv. campestris (strain 8004) GN=htpG PE=3 SV=1                                                          | 0.0205 | 2.1085 |
| betA    | sp Q8P5D7 BETA_XANCP Oxygen-dependent choline dehydrogenase OS=Xanthomonas campestris pv. campestris (strain ATCC 33913 / NCPPB 528 / LMG 568) GN=betA PE=3 SV=1              | 0.0265 | 2.1108 |
| metN1   | sp Q02ME3 METN1_PSEAB Methionine import ATP-binding protein MetN 1 OS=Pseudomonas aeruginosa (strain UCBPP-PA14) GN=metN1 PE=3 SV=1                                           | 0.0357 | 2.1159 |
| mip     | sp Q5ZXE0 MIP_LEGPH Outer membrane protein MIP OS=Legionella pneumophila subsp. pneumophila (strain Philadelphia 1 / ATCC 33152 / DSM 7513) GN=mip PE=1 SV=2                  | 0.0169 | 2.1213 |
| ahcY    | sp Q8PCH5 SAHH_XANCP Adenosylhomocysteinase OS=Xanthomonas campestris pv. campestris (strain ATCC 33913 / NCPPB 528 / LMG 568) GN=ahcY PE=3 SV=1                              | 0.0190 | 2.1314 |
| secD    | sp Q33517 SECD_RHOCB Protein translocase subunit SecD OS=Rhodobacter capsulatus (strain ATCC BAA-309 / NBRC 16581 / SB1003) GN=secD PE=3 SV=1                                 | 0.0317 | 2.1335 |
| HI_1208 | sp P71373 Y1208_HAEIN Epimerase family protein HI_1208 OS=Haemophilus influenzae (strain ATCC 51907 / DSM 11121 / KW20 / Rd) GN=HI_1208 PE=3 SV=1                             | 0.0338 | 2.1373 |
| rpmJ2   | sp Q1H1T1 RL362_METFK 50S ribosomal protein L36 2 OS=Methylobacillus flagellatus (strain KT / ATCC 51484 / DSM 6875) GN=rpmJ2 PE=3 SV=1                                       | 0.0509 | 2.1600 |
| dksA    | sp B8H0C0 DKSA_CAUCN RNA polymerase-binding transcription factor DksA OS=Caulobacter crescentus (strain NA1000 / CB15N) GN=dksA PE=3 SV=1                                     | 0.0334 | 2.1632 |
| acsA    | sp Q8P3L1 ACSA_XANCP Acetyl-coenzyme A synthetase OS=Xanthomonas campestris pv. campestris (strain ATCC 33913 / NCPPB 528 / LMG 568) GN=acsA PE=3 SV=1                        | 0.0449 | 2.1678 |
| pheS    | sp Q8P7Z5 SYFA_XANCP Phenylalanine--tRNA ligase alpha subunit OS=Xanthomonas campestris pv. campestris (strain ATCC 33913 / NCPPB 528 / LMG 568) GN=pheS PE=3 SV=1            | 0.0297 | 2.1768 |

|             |                                                                                                                                                                                      |        |        |
|-------------|--------------------------------------------------------------------------------------------------------------------------------------------------------------------------------------|--------|--------|
| yagR        | tr Q8P786 Q8P786_XANCP Oxidoreductase OS=Xanthomonas campestris pv. campestris (strain ATCC 33913 / NCPPB 528 / LMG 568) GN=yagR PE=4 SV=1                                           | 0.0329 | 2.1856 |
| stcV        | sp Q00727 STCV_EMENI Putative sterigmatocystin biosynthesis dehydrogenase stcV OS=Emericella nidulans (strain FGSC A4 / ATCC 38163 / CBS 112.46 / NRRL 194 / M139) GN=stcV PE=3 SV=2 | 0.0307 | 2.1882 |
| VC0395_0473 | sp A5F0B6 Y473_VIBC3 UPF0312 protein VC0395_0473/VC395_A0785 OS=Vibrio cholerae serotype O1 (strain ATCC 39541 / Classical Ogawa 395 / O395) GN=VC0395_0473 PE=3 SV=1                | 0.0281 | 2.2040 |
| queG        | sp Q8P8E0 QUEG_XANCP Epoxyqueuosine reductase OS=Xanthomonas campestris pv. campestris (strain ATCC 33913 / NCPPB 528 / LMG 568) GN=queG PE=3 SV=1                                   | 0.0469 | 2.2223 |
| XCC2823     | tr Q8P6Z2 Q8P6Z2_XANCP Uncharacterized protein OS=Xanthomonas campestris pv. campestris (strain ATCC 33913 / NCPPB 528 / LMG 568) GN=XCC2823 PE=4 SV=1                               | 0.0269 | 2.2249 |
| tsaC        | sp Q8P4F2 TSAC_XANCP Threonylcarbamoyl-AMP synthase OS=Xanthomonas campestris pv. campestris (strain ATCC 33913 / NCPPB 528 / LMG 568) GN=tsaC PE=3 SV=1                             | 0.0378 | 2.2276 |
| NMB0075     | sp Q51152 YHGF_NEIMB Uncharacterized protein NMB0075 OS=Neisseria meningitidis serogroup B (strain MC58) GN=NMB0075 PE=3 SV=2                                                        | 0.0230 | 2.2359 |
| XCC0864     | tr Q8PC71 Q8PC71_XANCP Transcriptional regulator OS=Xanthomonas campestris pv. campestris (strain ATCC 33913 / NCPPB 528 / LMG 568) GN=XCC0864 PE=4 SV=1                             | 0.0449 | 2.2362 |
| argG        | sp Q8P8J4 ASSY_XANCP Argininosuccinate synthase OS=Xanthomonas campestris pv. campestris (strain ATCC 33913 / NCPPB 528 / LMG 568) GN=argG PE=3 SV=1                                 | 0.0307 | 2.2464 |
| RP373       | sp Q9ZDF6 MAO2_RICPR Probable NADP-dependent malic enzyme OS=Rickettsia prowazekii (strain Madrid E) GN=RP373 PE=3 SV=1                                                              | 0.0257 | 2.2481 |
| gcvP        | sp Q8PBK7 GCSP_XANCP Glycine dehydrogenase (decarboxylating) OS=Xanthomonas campestris pv. campestris (strain ATCC 33913 / NCPPB 528 / LMG 568) GN=gcvP PE=3 SV=1                    | 0.0259 | 2.2551 |
| XCR_3563    | tr G0CEF3 G0CEF3_XANCA Tetratricopeptide repeat domain protein OS=Xanthomonas campestris pv. raphani 756C GN=XCR_3563 PE=4 SV=1                                                      | 0.0279 | 2.2628 |
| acsA        | sp Q8P3L1 ACSA_XANCP Acetyl-coenzyme A synthetase OS=Xanthomonas campestris pv. campestris (strain ATCC 33913 / NCPPB 528 / LMG 568) GN=acsA PE=3 SV=1                               | 0.0173 | 2.2650 |
| XCC2951     | tr Q8P6L6 Q8P6L6_XANCP Pseudouridylate synthase OS=Xanthomonas campestris pv. campestris (strain ATCC 33913 / NCPPB 528 / LMG 568) GN=XCC2951 PE=4 SV=1                              | 0.0183 | 2.2800 |
| XCC3527     | tr Q8P521 Q8P521_XANCP Endonuclease OS=Xanthomonas campestris pv. campestris (strain ATCC 33913 / NCPPB 528 / LMG 568) GN=XCC3527 PE=4 SV=1                                          | 0.0354 | 2.2994 |
| acsA        | sp Q8P3L1 ACSA_XANCP Acetyl-coenzyme A synthetase OS=Xanthomonas campestris pv. campestris (strain ATCC 33913 / NCPPB 528 / LMG 568) GN=acsA PE=3 SV=1                               | 0.0210 | 2.3021 |
| mexE        | tr Q8PDB9 Q8PDB9_XANCP Component of multidrug efflux system OS=Xanthomonas campestris pv. campestris (strain ATCC 33913 / NCPPB 528 / LMG 568) GN=mexE PE=4 SV=1                     | 0.0025 | 2.3098 |

|              |                                                                                                                                                            |        |        |
|--------------|------------------------------------------------------------------------------------------------------------------------------------------------------------|--------|--------|
| wxcM         | tr B0RVL6 B0RVL6_XANCB WxcM protein OS=Xanthomonas campestris pv. campestris (strain B100) GN=wxcM PE=4 SV=1                                               | 0.0466 | 2.3208 |
| treA         | sp Q8P519 TREA_XANCP Periplasmic trehalase OS=Xanthomonas campestris pv. campestris (strain ATCC 33913 / NCPPB 528 / LMG 568) GN=treA PE=3 SV=1            | 0.0396 | 2.3275 |
| XCC3994      | tr Q8P3S5 Q8P3S5_XANCP Uncharacterized protein OS=Xanthomonas campestris pv. campestris (strain ATCC 33913 / NCPPB 528 / LMG 568) GN=XCC3994 PE=4 SV=1     | 0.0331 | 2.3331 |
| secF         | tr G7TBP2 G7TBP2_XANOB Protein-export membrane protein SecF OS=Xanthomonas oryzae pv. oryzicola (strain BLS256) GN=secF PE=3 SV=1                          | 0.0177 | 2.3346 |
| rlmN         | sp B0RT51 RLMN_XANCB Dual-specificity RNA methyltransferase RlmN OS=Xanthomonas campestris pv. campestris (strain B100) GN=rlmN PE=3 SV=1                  | 0.0307 | 2.3420 |
| mak          | sp A5TYK2 MAK_MYCTA Maltokinase OS=Mycobacterium tuberculosis (strain ATCC 25177 / H37Ra) GN=mak PE=3 SV=1                                                 | 0.0024 | 2.3448 |
| XCC1433      | tr Q8PAP6 Q8PAP6_XANCP Uncharacterized protein OS=Xanthomonas campestris pv. campestris (strain ATCC 33913 / NCPPB 528 / LMG 568) GN=XCC1433 PE=4 SV=1     | 0.0056 | 2.3494 |
| ahcY         | sp Q8PCH5 SAHH_XANCP Adenosylhomocysteinase OS=Xanthomonas campestris pv. campestris (strain ATCC 33913 / NCPPB 528 / LMG 568) GN=ahcY PE=3 SV=1           | 0.0373 | 2.3541 |
| PROSTU_00109 | tr B2PU91 B2PU91_PROST Uncharacterized protein OS=Providencia stuartii ATCC 25827 GN=PROSTU_00109 PE=4 SV=1                                                | 0.0216 | 2.3659 |
| uvrC         | sp Q8P8W9 UVR_C_XANCP UvrABC system protein C OS=Xanthomonas campestris pv. campestris (strain ATCC 33913 / NCPPB 528 / LMG 568) GN=uvrC PE=3 SV=1         | 0.0412 | 2.3694 |
| pqqB         | sp Q8P6N0 PQQB_XANCP Coenzyme PQQ synthesis protein B OS=Xanthomonas campestris pv. campestris (strain ATCC 33913 / NCPPB 528 / LMG 568) GN=pqqB PE=3 SV=1 | 0.0396 | 2.3722 |
| tsf          | sp Q87A70 EFTS_XYLFT Elongation factor Ts OS=Xylella fastidiosa (strain Temecula1 / ATCC 700964) GN=tsf PE=3 SV=1                                          | 0.0387 | 2.3738 |
| XCC0267      | tr Q8PDR8 Q8PDR8_XANCP Uncharacterized protein OS=Xanthomonas campestris pv. campestris (strain ATCC 33913 / NCPPB 528 / LMG 568) GN=XCC0267 PE=4 SV=1     | 0.0219 | 2.3853 |
| oma1         | sp Q9P7G4 OMA1_SCHPO Mitochondrial metalloendopeptidase OMA1 OS=Schizosaccharomyces pombe (strain 972 / ATCC 24843) GN=oma1 PE=3 SV=1                      | 0.0341 | 2.3876 |
| coxS         | sp P19921 DCMS_OLICO Carbon monoxide dehydrogenase small chain OS=Oligotropha carboxidovorans (strain ATCC 49405 / DSM 1227 / OM5) GN=coxS PE=1 SV=2       | 0.0120 | 2.3912 |
| csd          | sp Q9PDA6 CSD_XYLFA Probable cysteine desulfurase OS=Xylella fastidiosa (strain 9a5c) GN=csd PE=3 SV=1                                                     | 0.0387 | 2.3936 |
| ndhC         | sp Q2JT70 NU3C_SYNJA NAD(P)H-quinone oxidoreductase subunit 3 OS=Synechococcus sp. (strain JA-3-3Ab) GN=ndhC PE=3 SV=1                                     | 0.0479 | 2.3984 |
| SPCC757.02c  | sp O74913 YJ72_SCHPO Uncharacterized protein C757.02c OS=Schizosaccharomyces pombe (strain 972 / ATCC 24843) GN=SPCC757.02c PE=4 SV=1                      | 0.0345 | 2.4043 |

|               |                                                                                                                                                                               |        |        |
|---------------|-------------------------------------------------------------------------------------------------------------------------------------------------------------------------------|--------|--------|
| glnA          | tr Q8P897 Q8P897_XANCP Glutamine synthetase OS=Xanthomonas campestris pv. campestris (strain ATCC 33913 / NCPPB 528 / LMG 568) GN=glnA PE=3 SV=1                              | 0.0230 | 2.4098 |
| XCC4195       | tr Q8P383 Q8P383_XANCP Uncharacterized protein OS=Xanthomonas campestris pv. campestris (strain ATCC 33913 / NCPPB 528 / LMG 568) GN=XCC4195 PE=4 SV=1                        | 0.0191 | 2.4117 |
| poxB          | tr Q8PDX8 Q8PDX8_XANCP Pyruvate dehydrogenase OS=Xanthomonas campestris pv. campestris (strain ATCC 33913 / NCPPB 528 / LMG 568) GN=poxB PE=3 SV=1                            | 0.0298 | 2.4119 |
| dxs           | sp Q8P815 DXS_XANCP 1-deoxy-D-xylulose-5-phosphate synthase OS=Xanthomonas campestris pv. campestris (strain ATCC 33913 / NCPPB 528 / LMG 568) GN=dxs PE=3 SV=1               | 0.0292 | 2.4127 |
| mltA          | tr V7Z8N0 V7Z8N0_9XANT Transglycosylase associated protein OS=Xanthomonas hortorum pv. carotae str. M081 GN=mltA PE=4 SV=1                                                    | 0.0307 | 2.4133 |
| ligD          | sp A0R3R7 LIGD_MYCS2 Multifunctional non-homologous end joining protein LigD OS=Mycobacterium smegmatis (strain ATCC 700084 / mc(2)155) GN=ligD PE=1 SV=2                     | 0.0033 | 2.4153 |
| MIMI_R526     | sp Q5UQ83 YR526_MIMIV Putative alpha/beta hydrolase R526 OS=Acanthamoeba polyphaga mimivirus GN=MIMI_R526 PE=1 SV=1                                                           | 0.0259 | 2.4326 |
| SPCC13B11.04c | sp O74540 FADH2_SCHPO Putative S-(hydroxymethyl)glutathione dehydrogenase 2 OS=Schizosaccharomyces pombe (strain 972 / ATCC 24843) GN=SPCC13B11.04c PE=3 SV=2                 | 0.0183 | 2.4329 |
| XCC0007       | tr Q8PEG9 Q8PEG9_XANCP Uncharacterized protein OS=Xanthomonas campestris pv. campestris (strain ATCC 33913 / NCPPB 528 / LMG 568) GN=XCC0007 PE=4 SV=1                        | 0.0088 | 2.4363 |
| sotB          | sp B1J9Y3 SOTB_PSEPW Probable sugar efflux transporter OS=Pseudomonas putida (strain W619) GN=sotB PE=3 SV=1                                                                  | 0.0239 | 2.4411 |
| Nmul_A2370    | sp Q2Y6G2 GPH_NITMU Phosphoglycolate phosphatase OS=Nitrosospora multiformis (strain ATCC 25196 / NCIMB 11849) GN=Nmul_A2370 PE=3 SV=1                                        | 0.0219 | 2.4429 |
| hemY          | tr Q8PDY8 Q8PDY8_XANCP Porphyrin biosynthesis protein OS=Xanthomonas campestris pv. campestris (strain ATCC 33913 / NCPPB 528 / LMG 568) GN=hemY PE=4 SV=1                    | 0.0222 | 2.4429 |
| oprF          | sp P37726 PORF_PSEFL Outer membrane porin F OS=Pseudomonas fluorescens GN=oprF PE=1 SV=1                                                                                      | 0.0127 | 2.4446 |
| ihfB          | sp Q9PAQ8 IHFB_XYLFA Integration host factor subunit beta OS=Xylella fastidiosa (strain 9a5c) GN=ihfB PE=3 SV=2                                                               | 0.0276 | 2.4493 |
| oxyR          | sp P52678 OXYR_MYCLE Probable hydrogen peroxide-inducible genes activator OS=Mycobacterium leprae (strain TN) GN=oxyR PE=3 SV=1                                               | 0.0329 | 2.4526 |
| araB          | sp Q1JUP5 ARALA_AZOBR L-arabinolactonase OS=Azospirillum brasilense GN=araB PE=1 SV=1                                                                                         | 0.0087 | 2.4647 |
| csd           | sp Q9PDA6 CSD_XYLFA Probable cysteine desulfurase OS=Xylella fastidiosa (strain 9a5c) GN=csd PE=3 SV=1                                                                        | 0.0414 | 2.4824 |
| SPCC757.02c   | sp O74913 YJ72_SCHPO Uncharacterized protein C757.02c OS=Schizosaccharomyces pombe (strain 972 / ATCC 24843) GN=SPCC757.02c PE=4 SV=1                                         | 0.0177 | 2.4946 |
| phS           | tr Q8P523 Q8P523_XANCP Histidine kinase/response regulator hybrid protein OS=Xanthomonas campestris pv. campestris (strain ATCC 33913 / NCPPB 528 / LMG 568) GN=phS PE=4 SV=1 | 0.0173 | 2.4983 |
| dnaB          | sp Q8K932 DNAB_BUCAP Replicative DNA helicase OS=Buchnera aphidicola subsp. Schizaphis graminum (strain Sg) GN=dnaB PE=3 SV=1                                                 | 0.0021 | 2.5109 |

|            |                                                                                                                                                                       |        |        |
|------------|-----------------------------------------------------------------------------------------------------------------------------------------------------------------------|--------|--------|
| XCC4164    | tr Q8P3B2 Q8P3B2_XANCP Uncharacterized protein OS=Xanthomonas campestris pv. campestris (strain ATCC 33913 / NCPPB 528 / LMG 568) GN=XCC4164 PE=4 SV=1                | 0.0009 | 2.5389 |
| TOP1E      | sp Q7T6X9 TOP1E_MIMIV DNA topoisomerase 1B OS=Acanthamoeba polyphaga mimivirus GN=TOP1E PE=1 SV=2                                                                     | 0.0278 | 2.5443 |
| XCAW_00637 | tr M4WC88 M4WC88_XANCI UPF0391 membrane protein XCAW_00637 OS=Xanthomonas citri subsp. citri Aw12879 GN=XCAW_00637 PE=3 SV=1                                          | 0.0342 | 2.5463 |
| ttgH       | sp Q93PU4 TTGH_PSEPT Toluene efflux pump membrane transporter TtgH OS=Pseudomonas putida (strain DOT-T1E) GN=ttgH PE=2 SV=2                                           | 0.0219 | 2.5478 |
| dhfrIII    | sp P12833 DYR3_SALTM Dihydrofolate reductase type 3 OS=Salmonella typhimurium GN=dhfrIII PE=1 SV=1                                                                    | 0.0183 | 2.5615 |
| prfC       | sp B8GTY2 RF3_THISH Peptide chain release factor 3 OS=Thioalkalivibrio sulfidiphilus (strain HL-EbGR7) GN=prfC PE=3 SV=1                                              | 0.0373 | 2.5617 |
| SSP0601    | sp Q49ZN0 FDHL_STAS1 Putative formate dehydrogenase SSP0601 OS=Staphylococcus saprophyticus subsp. saprophyticus (strain ATCC 15305 / DSM 20229) GN=SSP0601 PE=3 SV=1 | 0.0066 | 2.5620 |
| lolC       | sp Q8K9N8 LOLC_BUCAP Lipoprotein-releasing system transmembrane protein LolC OS=Buchnera aphidicola subsp. Schizaphis graminum (strain Sg) GN=lolC PE=3 SV=1          | 0.0140 | 2.5620 |
| rplU       | sp Q9PAS1 RL21_XYLFA 50S ribosomal protein L21 OS=Xylella fastidiosa (strain 9a5c) GN=rplU PE=3 SV=1                                                                  | 0.0361 | 2.5684 |
| ubiB       | sp B0RLZ0 UBIB_XANCB Probable protein kinase UbiB OS=Xanthomonas campestris pv. campestris (strain B100) GN=ubiB PE=3 SV=1                                            | 0.0026 | 2.5735 |
| XCC1390    | tr Q8PAT7 Q8PAT7_XANCP Uncharacterized protein OS=Xanthomonas campestris pv. campestris (strain ATCC 33913 / NCPPB 528 / LMG 568) GN=XCC1390 PE=4 SV=1                | 0.0150 | 2.5823 |
| glgX       | tr Q8P664 Q8P664_XANCP Glycogen operon protein GlgX homolog OS=Xanthomonas campestris pv. campestris (strain ATCC 33913 / NCPPB 528 / LMG 568) GN=glgX PE=4 SV=1      | 0.0172 | 2.5898 |
| glgX       | sp A8GKU9 GLGX_SERP5 Glycogen debranching enzyme OS=Serratia proteamaculans (strain 568) GN=glgX PE=3 SV=1                                                            | 0.0329 | 2.5979 |
| ML0594     | sp Q49682 Y594_MYCLE UPF0051 protein ML0594 OS=Mycobacterium leprae (strain TN) GN=ML0594 PE=3 SV=1                                                                   | 0.0047 | 2.5988 |
| XCC3526    | tr Q8P522 Q8P522_XANCP Uncharacterized protein OS=Xanthomonas campestris pv. campestris (strain ATCC 33913 / NCPPB 528 / LMG 568) GN=XCC3526 PE=4 SV=1                | 0.0239 | 2.6176 |
| acn        | sp P37032 ACON_LEGPH Aconitate hydratase A OS=Legionella pneumophila subsp. pneumophila (strain Philadelphia 1 / ATCC 33152 / DSM 7513) GN=acn PE=1 SV=1              | 0.0088 | 2.6209 |
| gabD1      | sp Q7U2I0 GABD1_MYCBO Succinate-semialdehyde dehydrogenase [NADP(+)] 1 OS=Mycobacterium bovis (strain ATCC BAA-935 / AF2122/97) GN=gabD1 PE=3 SV=2                    | 0.0398 | 2.6344 |
| lemA       | sp A8AVK0 LEMA_STRGC Protein LemA OS=Streptococcus gordonii (strain Challis / ATCC 35105 / CH1 / DL1 / V288) GN=lemA PE=2 SV=1                                        | 0.0047 | 2.6563 |
| egl        | sp P58599 GUN_RALSO Endoglucanase OS=Ralstonia solanacearum (strain GMI1000) GN=egl PE=3 SV=1                                                                         | 0.0020 | 2.6572 |
| glgX       | sp Q664I3 GLGX_YERPS Glycogen debranching enzyme OS=Yersinia pseudotuberculosis serotype I (strain IP32953) GN=glgX PE=3 SV=1                                         | 0.0235 | 2.6687 |

|           |                                                                                                                                                                                          |        |        |
|-----------|------------------------------------------------------------------------------------------------------------------------------------------------------------------------------------------|--------|--------|
| XCV4158   | tr Q3BMX4 Q3BMX4_XANC5 <i>Xanthomonas campestris</i> pv. <i>vesicatoria</i> complete genome OS= <i>Xanthomonas campestris</i> pv. <i>vesicatoria</i> (strain 85-10) GN=XCV4158 PE=4 SV=1 | 0.0225 | 2.6745 |
| betA      | sp Q8P5D7 BETA_XANCP Oxygen-dependent choline dehydrogenase OS= <i>Xanthomonas campestris</i> pv. <i>campestris</i> (strain ATCC 33913 / NCPPB 528 / LMG 568) GN=betA PE=3 SV=1          | 0.0230 | 2.6750 |
| dnaE      | sp P52022 DPO3A_VIBCH DNA polymerase III subunit alpha OS= <i>Vibrio cholerae</i> serotype O1 (strain ATCC 39315 / El Tor Inaba N16961) GN=dnaE PE=3 SV=3                                | 0.0014 | 2.6819 |
| glgX      | sp Q32AV4 GLGX_SHIDS Glycogen debranching enzyme OS= <i>Shigella dysenteriae</i> serotype 1 (strain Sd197) GN=glgX PE=3 SV=1                                                             | 0.0083 | 2.7114 |
| metX      | sp Q8P8L2 METX_XANCP Homoserine O-acetyltransferase OS= <i>Xanthomonas campestris</i> pv. <i>campestris</i> (strain ATCC 33913 / NCPPB 528 / LMG 568) GN=metX PE=3 SV=1                  | 0.0072 | 2.7230 |
| XOC_0250  | tr G7TJT7 G7TJT7_XANOB Alpha-amylase family protein OS= <i>Xanthomonas oryzae</i> pv. <i>oryzicola</i> (strain BLS256) GN=XOC_0250 PE=4 SV=1                                             | 0.0003 | 2.7279 |
| XCC2308   | tr Q8P8D4 Q8P8D4_XANCP Uncharacterized protein OS= <i>Xanthomonas campestris</i> pv. <i>campestris</i> (strain ATCC 33913 / NCPPB 528 / LMG 568) GN=XCC2308 PE=4 SV=1                    | 0.0019 | 2.7470 |
| egl       | sp P17974 GUN_RALSL Endoglucanase OS= <i>Ralstonia solanacearum</i> GN=egl PE=1 SV=2                                                                                                     | 0.0034 | 2.7638 |
| NA        | sp P55177 YAG5_STAAU Hydrolase in agr operon OS= <i>Staphylococcus aureus</i> PE=3 SV=1                                                                                                  | 0.0239 | 2.7837 |
| Arth_4510 | tr A0AWA9 A0AWA9_ARTS2 CHAP domain containing protein OS= <i>Arthrobacter</i> sp. (strain FB24) GN=Arth_4510 PE=4 SV=1                                                                   | 0.0016 | 2.8095 |
| glmU      | sp Q8PCZ1 GLMU_XANCP Bifunctional protein GlmU OS= <i>Xanthomonas campestris</i> pv. <i>campestris</i> (strain ATCC 33913 / NCPPB 528 / LMG 568) GN=glmU PE=3 SV=1                       | 0.0042 | 2.8101 |
| nrdB      | sp Q9KFH7 RIR2_BACHD Ribonucleoside-diphosphate reductase subunit beta OS= <i>Bacillus halodurans</i> (strain ATCC BAA-125 / DSM 18197 / FERM 7344 / JCM 9153 / C-125) GN=nrdB PE=1 SV=1 | 0.0250 | 2.8120 |
| ahpC      | sp Q49UT8 AHPC_STAS1 Alkyl hydroperoxide reductase subunit C OS= <i>Staphylococcus saprophyticus</i> subsp. <i>saprophyticus</i> (strain ATCC 15305 / DSM 20229) GN=ahpC PE=3 SV=1       | 0.0010 | 2.8153 |
| XCR_3694  | tr G0CF83 G0CF83_XANCA Uncharacterized protein OS= <i>Xanthomonas campestris</i> pv. <i>raphani</i> 756C GN=XCR_3694 PE=4 SV=1                                                           | 0.0169 | 2.8237 |
| dsbA      | sp O52376 DSBA_PSESM Thiol:disulfide interchange protein DsbA OS= <i>Pseudomonas syringae</i> pv. <i>tomato</i> (strain DC3000) GN=dsbA PE=3 SV=1                                        | 0.0007 | 2.8327 |
| nrdB      | sp Q9KFH7 RIR2_BACHD Ribonucleoside-diphosphate reductase subunit beta OS= <i>Bacillus halodurans</i> (strain ATCC BAA-125 / DSM 18197 / FERM 7344 / JCM 9153 / C-125) GN=nrdB PE=1 SV=1 | 0.0002 | 2.8363 |
| Arth_4510 | tr A0AWA9 A0AWA9_ARTS2 CHAP domain containing protein OS= <i>Arthrobacter</i> sp. (strain FB24) GN=Arth_4510 PE=4 SV=1                                                                   | 0.0002 | 2.8377 |
| GLX3      | sp Q5AF03 HSP31_CANAL Glyoxalase 3 OS= <i>Candida albicans</i> (strain SC5314 / ATCC MYA-2876) GN=GLX3 PE=1 SV=1                                                                         | 0.0059 | 2.8518 |
| XCC1390   | tr Q8PAT7 Q8PAT7_XANCP Uncharacterized protein OS= <i>Xanthomonas campestris</i> pv. <i>campestris</i> (strain ATCC 33913 / NCPPB 528 / LMG 568) GN=XCC1390 PE=4 SV=1                    | 0.0289 | 2.8980 |
| slyD      | sp Q9KNX6 SLYD_VIBCH FKBP-type peptidyl-prolyl cis-trans isomerase SlyD OS= <i>Vibrio cholerae</i> serotype O1 (strain ATCC 39315 / El Tor Inaba N16961) GN=slyD PE=1 SV=1               | 0.0074 | 2.9042 |

|         |                                                                                                                                                                  |        |        |
|---------|------------------------------------------------------------------------------------------------------------------------------------------------------------------|--------|--------|
| oprN    | tr Q8PAN7 Q8PAN7_XANCP Outer membrane protein OS=Xanthomonas campestris pv. campestris (strain ATCC 33913 / NCPPB 528 / LMG 568) GN=oprN PE=4 SV=1               | 0.0030 | 2.9145 |
| trpS    | sp Q8P3Z4 SYW_XANCP Tryptophan--tRNA ligase OS=Xanthomonas campestris pv. campestris (strain ATCC 33913 / NCPPB 528 / LMG 568) GN=trpS PE=3 SV=1                 | 0.0016 | 2.9264 |
| ttgD    | sp Q9KVV5 TTGD_PSEPT Toluene efflux pump periplasmic linker protein TtgD OS=Pseudomonas putida (strain DOT-T1E) GN=ttgD PE=2 SV=2                                | 0.0063 | 2.9266 |
| XCC3889 | tr Q8P427 Q8P427_XANCP Uncharacterized protein OS=Xanthomonas campestris pv. campestris (strain ATCC 33913 / NCPPB 528 / LMG 568) GN=XCC3889 PE=4 SV=1           | 0.0023 | 2.9689 |
| ligD    | sp A0R3R7 LIGD_MYCS2 Multifunctional non-homologous end joining protein LigD OS=Mycobacterium smegmatis (strain ATCC 700084 / mc(2)155) GN=ligD PE=1 SV=2        | 0.0001 | 2.9699 |
| amyC    | sp P14899 AMY3_DICT6 Alpha-amylase 3 OS=Dictyoglomus thermophilum (strain ATCC 35947 / DSM 3960 / H-6-12) GN=amyC PE=3 SV=2                                      | 0.0028 | 2.9938 |
| ywbl    | sp P39592 YWBI_BACSU Uncharacterized HTH-type transcriptional regulator Ywbl OS=Bacillus subtilis (strain 168) GN=ywbl PE=3 SV=1                                 | 0.0021 | 2.9951 |
| glpK    | sp Q8PDI0 GLPK_XANCP Glycerol kinase OS=Xanthomonas campestris pv. campestris (strain ATCC 33913 / NCPPB 528 / LMG 568) GN=glpK PE=3 SV=1                        | 0.0123 | 3.0086 |
| XCC3885 | tr Q8P431 Q8P431_XANCP Hydrolase or peptidase OS=Xanthomonas campestris pv. campestris (strain ATCC 33913 / NCPPB 528 / LMG 568) GN=XCC3885 PE=1 SV=1            | 0.0204 | 3.0291 |
| sbp     | tr B0RU36 B0RU36_XANCB Sbp protein OS=Xanthomonas campestris pv. campestris (strain B100) GN=sbp PE=4 SV=1                                                       | 0.0158 | 3.0380 |
| XCC0105 | tr Q8PE76 Q8PE76_XANCP ATP-dependent DNA ligase OS=Xanthomonas campestris pv. campestris (strain ATCC 33913 / NCPPB 528 / LMG 568) GN=XCC0105 PE=4 SV=1          | 0.0018 | 3.0744 |
| lptD    | sp Q8PCE0 LPTD_XANCP LPS-assembly protein LptD OS=Xanthomonas campestris pv. campestris (strain ATCC 33913 / NCPPB 528 / LMG 568) GN=lptD PE=3 SV=1              | 0.0097 | 3.0744 |
| glgX    | sp A4WFL4 GLGX_ENT38 Glycogen debranching enzyme OS=Enterobacter sp. (strain 638) GN=glgX PE=3 SV=1                                                              | 0.0006 | 3.0766 |
| uup     | tr M4WKN0 M4WKN0_XANCI ATPase component of ABC transporter OS=Xanthomonas citri subsp. citri Aw12879 GN=uup PE=3 SV=1                                            | 0.0158 | 3.0789 |
| gabD1   | sp A0PN13 GABD1_MYCUA Succinate-semialdehyde dehydrogenase [NADP(+)] 1 OS=Mycobacterium ulcerans (strain Agy99) GN=gabD1 PE=3 SV=1                               | 0.0016 | 3.0998 |
| queF    | sp B0RWU6 QUEF_XANCB NADPH-dependent 7-cyano-7-deazaguanine reductase OS=Xanthomonas campestris pv. campestris (strain B100) GN=queF PE=3 SV=1                   | 0.0004 | 3.1045 |
| ligD    | sp A0R3R7 LIGD_MYCS2 Multifunctional non-homologous end joining protein LigD OS=Mycobacterium smegmatis (strain ATCC 700084 / mc(2)155) GN=ligD PE=1 SV=2        | 0.0001 | 3.1046 |
| cqsS    | sp Q9KM66 CQSS_VIBCH CAI-1 autoinducer sensor kinase/phosphatase CqsS OS=Vibrio cholerae serotype O1 (strain ATCC 39315 / El Tor Inaba N16961) GN=cqsS PE=1 SV=1 | 0.0029 | 3.1274 |



|           |                                                                                                                                                        |        |        |
|-----------|--------------------------------------------------------------------------------------------------------------------------------------------------------|--------|--------|
| rpsT      | sp Q8PBG9 RS20_XANCP 30S ribosomal protein S20 OS=Xanthomonas campestris pv. campestris (strain ATCC 33913 / NCPPB 528 / LMG 568) GN=rpsT PE=3 SV=1    | 0.0002 | 3.1452 |
| adh1      | sp P00332 ADH_SCHPO Alcohol dehydrogenase OS=Schizosaccharomyces pombe (strain 972 / ATCC 24843) GN=adh1 PE=1 SV=2                                     | 0.0001 | 3.3749 |
| XCC3073   | tr Q8P697 Q8P697_XANCP Glutathione transferase OS=Xanthomonas campestris pv. campestris (strain ATCC 33913 / NCPPB 528 / LMG 568) GN=XCC3073 PE=4 SV=1 | 0.0002 | 3.4612 |
| yhdF      | sp O07575 YHDF_BACSU Uncharacterized oxidoreductase YhdF OS=Bacillus subtilis (strain 168) GN=yhdF PE=3 SV=1                                           | 0.0002 | 3.5062 |
| yiaA      | tr Q8P498 Q8P498_XANCP Membrane protein OS=Xanthomonas campestris pv. campestris (strain ATCC 33913 / NCPPB 528 / LMG 568) GN=yiaA PE=4 SV=1           | 0.0000 | 3.5224 |
| mdtB      | sp C6CAI2 MDTB_DICDC Multidrug resistance protein MdtB OS=Dickeya dadantii (strain Ech703) GN=mdtB PE=3 SV=1                                           | 0.0000 | 3.6821 |
| XC_2759   | tr Q4UT15 Q4UT15_XANC8 Uncharacterized protein OS=Xanthomonas campestris pv. campestris (strain 8004) GN=XC_2759 PE=4 SV=1                             | 0.0000 | 3.6857 |
| XCR_4088  | tr G0CJ86 G0CJ86_XANCA Oxidoreductase OS=Xanthomonas campestris pv. raphani 756C GN=XCR_4088 PE=3 SV=1                                                 | 0.0000 | 3.6950 |
| katE      | sp P95539 CATE_PSEPU Catalase HP11 OS=Pseudomonas putida GN=katE PE=3 SV=1                                                                             | 0.0000 | 3.7319 |
| XCR_0031  | tr G0CGQ6 G0CGQ6_XANCA Peptidase propeptide and ypeb domain protein OS=Xanthomonas campestris pv. raphani 756C GN=XCR_0031 PE=4 SV=1                   | 0.0001 | 3.7706 |
| bamB      | sp F5ZAY7 BAMB_ALTSS Outer membrane protein assembly factor BamB OS=Alteromonas sp. (strain SN2) GN=bamB PE=3 SV=2                                     | 0.0042 | 3.8313 |
| XCC3924   | sp Q8P3Z3 Y3924_XANCP UPF0337 protein XCC3924 OS=Xanthomonas campestris pv. campestris (strain ATCC 33913 / NCPPB 528 / LMG 568) GN=XCC3924 PE=3 SV=1  | 0.0001 | 4.1450 |
| XCC2150   | tr Q8P8T8 Q8P8T8_XANCP Uncharacterized protein OS=Xanthomonas campestris pv. campestris (strain ATCC 33913 / NCPPB 528 / LMG 568) GN=XCC2150 PE=4 SV=1 | 0.0001 | 4.1464 |
| MIMI_R526 | sp Q5UQ83 YR526_MIMIV Putative alpha/beta hydrolase R526 OS=Acanthamoeba polyphaga mimivirus GN=MIMI_R526 PE=1 SV=1                                    | 0.0000 | 4.1891 |
| XCC1318   | tr Q8PB08 Q8PB08_XANCP Uncharacterized protein OS=Xanthomonas campestris pv. campestris (strain ATCC 33913 / NCPPB 528 / LMG 568) GN=XCC1318 PE=4 SV=1 | 0.0000 | 4.1934 |
| mdtB      | sp A8AEE6 MDTB_CITK8 Multidrug resistance protein MdtB OS=Citrobacter koseri (strain ATCC BAA-895 / CDC 4225-83 / SGSC4696) GN=mdtB PE=3 SV=1          | 0.0000 | 4.2346 |
| katE      | sp P95539 CATE_PSEPU Catalase HP11 OS=Pseudomonas putida GN=katE PE=3 SV=1                                                                             | 0.0000 | 4.3452 |
| yhdF      | sp O07575 YHDF_BACSU Uncharacterized oxidoreductase YhdF OS=Bacillus subtilis (strain 168) GN=yhdF PE=3 SV=1                                           | 0.0000 | 4.3609 |
| XCC0134   | tr Q8PE49 Q8PE49_XANCP Trehalose synthase OS=Xanthomonas campestris pv. campestris (strain ATCC 33913 / NCPPB 528 / LMG 568) GN=XCC0134 PE=4 SV=1      | 0.0001 | 4.4547 |
| XCR_3876  | tr G0CGM5 G0CGM5_XANCA Cellulase OS=Xanthomonas campestris pv. raphani 756C GN=XCR_3876 PE=3 SV=1                                                      | 0.0000 | 4.5112 |
| XCC2020   | tr Q8P946 Q8P946_XANCP Uncharacterized protein OS=Xanthomonas campestris pv. campestris (strain ATCC 33913 / NCPPB 528 / LMG 568) GN=XCC2020 PE=4 SV=1 | 0.0000 | 5.0551 |

|                                                                 |                                                                                                                                                                                      |        |        |
|-----------------------------------------------------------------|--------------------------------------------------------------------------------------------------------------------------------------------------------------------------------------|--------|--------|
| CA_C2800                                                        | sp Q97FE0 MCAT_CLOAB Probable manganese catalase OS=Clostridium acetobutylicum (strain ATCC 824 / DSM 792 / JCM 1419 / LMG 5710 / VKM B-1787) GN=CA_C2800 PE=3 SV=1                  | 0.0000 | 5.5156 |
|                                                                 |                                                                                                                                                                                      |        |        |
|                                                                 |                                                                                                                                                                                      |        |        |
| <b>List of up-regulated DEGs in the comparison I3CvsControl</b> |                                                                                                                                                                                      |        |        |
| Gene                                                            | Description                                                                                                                                                                          | fdr    | log2fc |
| glgZ                                                            | tr B0RMT8 B0RMT8_XANCB Malto-oligosyltrehalose trehalohydrolase OS=Xanthomonas campestris pv. campestris (strain B100) GN=glgZ PE=3 SV=1                                             | 0.0283 | 2.3751 |
| rhaB                                                            | sp C6DJR3 RHAB_PECCP Rhamnulokinase OS=Pectobacterium carotovorum subsp. carotovorum (strain PC1) GN=rhaB PE=3 SV=1                                                                  | 0.0051 | 2.4490 |
| rplB                                                            | sp Q9PE73 RL2_XYLFA 50S ribosomal protein L2 OS=Xylella fastidiosa (strain 9a5c) GN=rplB PE=3 SV=1                                                                                   | 0.0302 | 2.5690 |
| sodC2                                                           | sp O66602 SODC2_AQUAE Superoxide dismutase [Cu-Zn] 2 OS=Aquifex aeolicus (strain VF5) GN=sodC2 PE=3 SV=1                                                                             | 0.0262 | 2.5894 |
| macB                                                            | sp Q7ULB5 MACB_RHOBA Macrolide export ATP-binding/permease protein MacB OS=Rhodopirellula baltica (strain SH1) GN=macB PE=3 SV=1                                                     | 0.0001 | 2.5995 |
| aroE                                                            | sp Q8P3W6 AROE_XANCP Shikimate dehydrogenase (NADP(+)) OS=Xanthomonas campestris pv. campestris (strain ATCC 33913 / NCPPB 528 / LMG 568) GN=aroE PE=3 SV=1                          | 0.0221 | 2.6197 |
| speA                                                            | sp Q8P448 SPEA_XANCP Biosynthetic arginine decarboxylase OS=Xanthomonas campestris pv. campestris (strain ATCC 33913 / NCPPB 528 / LMG 568) GN=speA PE=3 SV=2                        | 0.0086 | 2.6302 |
| rne                                                             | tr Q5GY94 Q5GY94_XANOR Ribonuclease E OS=Xanthomonas oryzae pv. oryzae (strain KACC10331 / KXO85) GN=rne PE=3 SV=1                                                                   | 0.0262 | 2.6388 |
| leuS                                                            | sp Q8P7J1 SYL_XANCP Leucine--tRNA ligase OS=Xanthomonas campestris pv. campestris (strain ATCC 33913 / NCPPB 528 / LMG 568) GN=leuS PE=3 SV=2                                        | 0.0255 | 2.6440 |
| XCC1489                                                         | tr Q8PAJ4 Q8PAJ4_XANCP Uncharacterized protein OS=Xanthomonas campestris pv. campestris (strain ATCC 33913 / NCPPB 528 / LMG 568) GN=XCC1489 PE=4 SV=1                               | 0.0428 | 2.6494 |
| XCC4164                                                         | tr Q8P3B2 Q8P3B2_XANCP Uncharacterized protein OS=Xanthomonas campestris pv. campestris (strain ATCC 33913 / NCPPB 528 / LMG 568) GN=XCC4164 PE=4 SV=1                               | 0.0316 | 2.6574 |
| HI_1056                                                         | sp P71366 T3MH_HAEIN Putative type III restriction-modification system HindVIP enzyme mod OS=Haemophilus influenzae (strain ATCC 51907 / DSM 11121 / KW20 / Rd) GN=HI_1056 PE=3 SV=1 | 0.0334 | 2.6771 |
| engXCA                                                          | sp P19487 GUNA_XANCP Major extracellular endoglucanase OS=Xanthomonas campestris pv. campestris (strain ATCC 33913 / NCPPB 528 / LMG 568) GN=engXCA PE=1 SV=2                        | 0.0385 | 2.7093 |
| ligD                                                            | sp A0R3R7 LIGD_MYCS2 Multifunctional non-homologous end joining protein LigD OS=Mycobacterium smegmatis (strain ATCC 700084 / mc(2)155) GN=ligD PE=1 SV=2                            | 0.0352 | 2.7345 |
| tolB                                                            | sp B8JD21 TOLB_ANAD2 Protein TolB OS=Anaeromyxobacter dehalogenans (strain 2CP-1 / ATCC BAA-258) GN=tolB PE=3 SV=1                                                                   | 0.0235 | 2.7755 |

|            |                                                                                                                                                                         |        |        |
|------------|-------------------------------------------------------------------------------------------------------------------------------------------------------------------------|--------|--------|
| oar        | tr V7ZCB1 V7ZCB1_9XANT Oar protein OS=Xanthomonas hortorum pv. carotae str. M081 GN=oar PE=4 SV=1                                                                       | 0.0384 | 2.7951 |
| acsA       | sp Q8P3L1 ACSA_XANCP Acetyl-coenzyme A synthetase OS=Xanthomonas campestris pv. campestris (strain ATCC 33913 / NCPPB 528 / LMG 568) GN=acsA PE=3 SV=1                  | 0.0286 | 2.7962 |
| malQ       | tr B0RMT9 B0RMT9_XANCB MalQ protein OS=Xanthomonas campestris pv. campestris (strain B100) GN=malQ PE=4 SV=1                                                            | 0.0177 | 2.8066 |
| Alvin_0064 | sp P45373 Y064_ALLVD Uncharacterized protein Alvin_0064 OS=Allochromatium vinosum (strain ATCC 17899 / DSM 180 / NBRC 103801 / NCIMB 10441 / D) GN=Alvin_0064 PE=4 SV=1 | 0.0229 | 2.8164 |
| secD       | tr Q8P870 Q8P870_XANCP Protein translocase subunit SecD OS=Xanthomonas campestris pv. campestris (strain ATCC 33913 / NCPPB 528 / LMG 568) GN=secD PE=3 SV=1            | 0.0084 | 2.8177 |
| dnaN       | sp Q9KVX5 DPO3B_VIBCH DNA polymerase III subunit beta OS=Vibrio cholerae serotype O1 (strain ATCC 39315 / El Tor Inaba N16961) GN=dnaN PE=3 SV=1                        | 0.0298 | 2.8227 |
| oar        | tr Q8P7N8 Q8P7N8_XANCP Oar protein OS=Xanthomonas campestris pv. campestris (strain ATCC 33913 / NCPPB 528 / LMG 568) GN=oar PE=4 SV=1                                  | 0.0239 | 2.8290 |
| parC       | sp Q1RGX8 PARC_RICBR DNA topoisomerase 4 subunit A OS=Rickettsia bellii (strain RML369-C) GN=parC PE=3 SV=1                                                             | 0.0324 | 2.8367 |
| fruA       | sp P23355 PTFBC_XANCP PTS system fructose-specific EIIBC component OS=Xanthomonas campestris pv. campestris (strain ATCC 33913 / NCPPB 528 / LMG 568) GN=fruA PE=1 SV=2 | 0.0255 | 2.8552 |
| XACM_1330  | tr G2LXB4 G2LXB4_9XANT Uncharacterized protein OS=Xanthomonas axonopodis pv. citrumelo F1 GN=XACM_1330 PE=4 SV=1                                                        | 0.0427 | 2.8646 |
| incC       | sp P07673 INCC2_ECOLX Protein IncC OS=Escherichia coli GN=incC PE=3 SV=1                                                                                                | 0.0305 | 2.8696 |
| XCC3655    | tr Q8P4Q2 Q8P4Q2_XANCP Uncharacterized protein OS=Xanthomonas campestris pv. campestris (strain ATCC 33913 / NCPPB 528 / LMG 568) GN=XCC3655 PE=4 SV=1                  | 0.0021 | 2.8789 |
| gyrB       | sp O67137 GYRB_AQUAE DNA gyrase subunit B OS=Aquifex aeolicus (strain VF5) GN=gyrB PE=3 SV=1                                                                            | 0.0062 | 2.8927 |
| asn1       | sp P78753 ASNS_SCHPO Probable asparagine synthetase [glutamine-hydrolyzing] OS=Schizosaccharomyces pombe (strain 972 / ATCC 24843) GN=asn1 PE=1 SV=3                    | 0.0487 | 2.9087 |
| typA       | sp P57508 TYPA_BUCAI GTP-binding protein TypA/BipA homolog OS=Buchnera aphidicola subsp. Acyrthosiphon pisum (strain APS) GN=typA PE=3 SV=1                             | 0.0248 | 2.9179 |
| rne        | sp Q8K9J9 RNE_BUCAP Ribonuclease E OS=Buchnera aphidicola subsp. Schizaphis graminum (strain Sg) GN=rne PE=3 SV=1                                                       | 0.0123 | 2.9212 |
| secD       | sp O33517 SECD_RHOEB Protein translocase subunit SecD OS=Rhodobacter capsulatus (strain ATCC BAA-309 / NBRC 16581 / SB1003) GN=secD PE=3 SV=1                           | 0.0269 | 2.9242 |
| pheS       | sp Q8P7Z5 SYFA_XANCP Phenylalanine--tRNA ligase alpha subunit OS=Xanthomonas campestris pv. campestris (strain ATCC 33913 / NCPPB 528 / LMG 568) GN=pheS PE=3 SV=1      | 0.0206 | 2.9244 |
| XCC2057    | tr Q8P909 Q8P909_XANCP Phage-related protein OS=Xanthomonas campestris pv. campestris (strain ATCC 33913 / NCPPB 528 / LMG 568) GN=XCC2057 PE=4 SV=1                    | 0.0155 | 2.9280 |

|            |                                                                                                                                                                                  |        |        |
|------------|----------------------------------------------------------------------------------------------------------------------------------------------------------------------------------|--------|--------|
| parE       | sp Q1RK03 PARE_RICBR DNA topoisomerase 4 subunit B OS=Rickettsia bellii (strain RML369-C) GN=parE PE=3 SV=1                                                                      | 0.0439 | 2.9280 |
| cysK       | sp O32978 CYSK_MYCLE O-acetylserine sulfhydrylase OS=Mycobacterium leprae (strain TN) GN=cysK PE=3 SV=1                                                                          | 0.0271 | 2.9319 |
| gltB       | sp Q05755 GLTB_AZOBR Glutamate synthase [NADPH] large chain OS=Azospirillum brasilense GN=gltB PE=1 SV=1                                                                         | 0.0149 | 2.9418 |
| fabA       | sp Q8PCW9 FABA_XANCP 3-hydroxydecanoyl-[acyl-carrier-protein] dehydratase OS=Xanthomonas campestris pv. campestris (strain ATCC 33913 / NCPPB 528 / LMG 568) GN=fabA PE=3 SV=1   | 0.0060 | 2.9521 |
| oar        | tr Q8P7N8 Q8P7N8_XANCP Oar protein OS=Xanthomonas campestris pv. campestris (strain ATCC 33913 / NCPPB 528 / LMG 568) GN=oar PE=4 SV=1                                           | 0.0470 | 2.9523 |
| cysG       | sp Q9PF46 CYSG_XYLFA Siroheme synthase OS=Xylella fastidiosa (strain 9a5c) GN=cysG PE=3 SV=1                                                                                     | 0.0106 | 2.9548 |
| purC       | sp Q3BYD2 PUR7_XANC5 Phosphoribosylaminoimidazole-succinocarboxamide synthase OS=Xanthomonas campestris pv. vesicatoria (strain 85-10) GN=purC PE=3 SV=1                         | 0.0306 | 2.9561 |
| nrdB       | sp Q9KFH7 RIR2_BACHD Ribonucleoside-diphosphate reductase subunit beta OS=Bacillus halodurans (strain ATCC BAA-125 / DSM 18197 / FERM 7344 / JCM 9153 / C-125) GN=nrdB PE=1 SV=1 | 0.0136 | 2.9583 |
| sotB       | sp B1J9Y3 SOTB_PSEPW Probable sugar efflux transporter OS=Pseudomonas putida (strain W619) GN=sotB PE=3 SV=1                                                                     | 0.0295 | 2.9718 |
| orn        | sp Q8P8S1 ORN_XANCP Oligoribonuclease OS=Xanthomonas campestris pv. campestris (strain ATCC 33913 / NCPPB 528 / LMG 568) GN=orn PE=1 SV=1                                        | 0.0169 | 2.9876 |
| asnS       | sp Q8PAC4 SYN_XANCP Asparagine--tRNA ligase OS=Xanthomonas campestris pv. campestris (strain ATCC 33913 / NCPPB 528 / LMG 568) GN=asnS PE=3 SV=1                                 | 0.0416 | 2.9881 |
| XCC0007    | tr Q8PEG9 Q8PEG9_XANCP Uncharacterized protein OS=Xanthomonas campestris pv. campestris (strain ATCC 33913 / NCPPB 528 / LMG 568) GN=XCC0007 PE=4 SV=1                           | 0.0345 | 2.9895 |
| dnaB       | sp Q8K932 DNAB_BUCAP Replicative DNA helicase OS=Buchnera aphidicola subsp. Schizaphis graminum (strain Sg) GN=dnaB PE=3 SV=1                                                    | 0.0088 | 3.0100 |
| glyS       | sp Q8P3I5 SYGB_XANCP Glycine--tRNA ligase beta subunit OS=Xanthomonas campestris pv. campestris (strain ATCC 33913 / NCPPB 528 / LMG 568) GN=glyS PE=3 SV=1                      | 0.0303 | 3.0186 |
| XCC3743    | tr Q8P4G5 Q8P4G5_XANCP Uncharacterized protein OS=Xanthomonas campestris pv. campestris (strain ATCC 33913 / NCPPB 528 / LMG 568) GN=XCC3743 PE=4 SV=1                           | 0.0096 | 3.0381 |
| NGR_a02410 | sp P55577 Y4NA_RHISN Uncharacterized peptidase y4nA OS=Rhizobium sp. (strain NGR234) GN=NGR_a02410 PE=3 SV=1                                                                     | 0.0385 | 3.0495 |
| XHC_1649   | tr V7ZF87 V7ZF87_9XANT Metallopeptidase OS=Xanthomonas hortorum pv. carotae str. M081 GN=XHC_1649 PE=4 SV=1                                                                      | 0.0173 | 3.0510 |
| RP373      | sp Q9ZDF6 MAO2_RICPR Probable NADP-dependent malic enzyme OS=Rickettsia prowazekii (strain Madrid E) GN=RP373 PE=3 SV=1                                                          | 0.0229 | 3.0682 |
| XC_2759    | tr Q4UT15 Q4UT15_XANC8 Uncharacterized protein OS=Xanthomonas campestris pv. campestris (strain 8004) GN=XC_2759 PE=4 SV=1                                                       | 0.0248 | 3.0703 |
| accC       | sp O52058 ACCC_ALLVD Biotin carboxylase OS=Allochrocatium vinosum (strain ATCC 17899 / DSM 180 / NBRC 103801 / NCIMB 10441 / D) GN=accC PE=3 SV=2                                | 0.0040 | 3.0726 |

|          |                                                                                                                                                          |        |        |
|----------|----------------------------------------------------------------------------------------------------------------------------------------------------------|--------|--------|
| NA       | sp Q43914 DLHH_AZOBR Putative carboxymethylenebutenolidase OS=Azospirillum brasilense PE=3 SV=1                                                          | 0.0016 | 3.0931 |
| atpA     | sp Q9KNH3 ATPA_VIBCH ATP synthase subunit alpha OS=Vibrio cholerae serotype O1 (strain ATCC 39315 / El Tor Inaba N16961) GN=atpA PE=3 SV=2               | 0.0339 | 3.1088 |
| rpsB     | sp Q4USR2 RS2_XANC8 30S ribosomal protein S2 OS=Xanthomonas campestris pv. campestris (strain 8004) GN=rpsB PE=3 SV=1                                    | 0.0255 | 3.1105 |
| btuB     | tr Q8P6U8 Q8P6U8_XANCP TonB-dependent receptor OS=Xanthomonas campestris pv. campestris (strain ATCC 33913 / NCPPB 528 / LMG 568) GN=btuB PE=3 SV=1      | 0.0057 | 3.1299 |
| phnA     | sp Q02419 PHNA_STRMU Protein PhnA OS=Streptococcus mutans serotype c (strain ATCC 700610 / UA159) GN=phnA PE=4 SV=2                                      | 0.0385 | 3.1302 |
| der      | sp Q668A3 DER_YERPS GTPase Der OS=Yersinia pseudotuberculosis serotype I (strain IP32953) GN=der PE=3 SV=1                                               | 0.0380 | 3.1315 |
| sbpA     | sp P27366 SUBI_SYNE7 Sulfate-binding protein OS=Synechococcus elongatus (strain PCC 7942) GN=sbpA PE=2 SV=1                                              | 0.0428 | 3.1404 |
| rplM     | sp B4SLE1 RL13_STRM5 50S ribosomal protein L13 OS=Stenotrophomonas maltophilia (strain R551-3) GN=rplM PE=3 SV=1                                         | 0.0210 | 3.1479 |
| secF     | tr G7TBP2 G7TBP2_XANOB Protein-export membrane protein SecF OS=Xanthomonas oryzae pv. oryzicola (strain BLS256) GN=secF PE=3 SV=1                        | 0.0044 | 3.1539 |
| pdeA     | tr Q8P9A7 Q8P9A7_XANCP C-di-GMP phosphodiesterase A OS=Xanthomonas campestris pv. campestris (strain ATCC 33913 / NCPPB 528 / LMG 568) GN=pdeA PE=4 SV=1 | 0.0499 | 3.1591 |
| NA       | uncharacterized RNA                                                                                                                                      | 0.0352 | 3.1594 |
| XCC1181  | tr Q8PBE1 Q8PBE1_XANCP Uncharacterized protein OS=Xanthomonas campestris pv. campestris (strain ATCC 33913 / NCPPB 528 / LMG 568) GN=XCC1181 PE=4 SV=1   | 0.0335 | 3.1701 |
| glgX     | sp Q664I3 GLGX_YERPS Glycogen debranching enzyme OS=Yersinia pseudotuberculosis serotype I (strain IP32953) GN=glgX PE=3 SV=1                            | 0.0428 | 3.1987 |
| wxcM     | tr B0RVL6 B0RVL6_XANCB WxcM protein OS=Xanthomonas campestris pv. campestris (strain B100) GN=wxcM PE=4 SV=1                                             | 0.0121 | 3.2128 |
| rpmB     | sp B8GUR2 RL28_THISH 50S ribosomal protein L28 OS=Thioalkalivibrio sulfidiphilus (strain HL-EbGR7) GN=rpmB PE=3 SV=1                                     | 0.0013 | 3.2179 |
| XCC0007  | tr Q8PEG9 Q8PEG9_XANCP Uncharacterized protein OS=Xanthomonas campestris pv. campestris (strain ATCC 33913 / NCPPB 528 / LMG 568) GN=XCC0007 PE=4 SV=1   | 0.0040 | 3.2205 |
| ihfB     | sp Q9PAQ8 IHFB_XYLFA Integration host factor subunit beta OS=Xylella fastidiosa (strain 9a5c) GN=ihfB PE=3 SV=2                                          | 0.0057 | 3.2493 |
| XOC_4349 | tr G7TM65 G7TM65_XANOB Transcriptional regulatory protein OS=Xanthomonas oryzae pv. oryzicola (strain BLS256) GN=XOC_4349 PE=4 SV=1                      | 0.0236 | 3.2597 |
| lrp      | sp P45265 LRP_HAEIN Leucine-responsive regulatory protein OS=Haemophilus influenzae (strain ATCC 51907 / DSM 11121 / KW20 / Rd) GN=lrp PE=3 SV=1         | 0.0072 | 3.2867 |
| NlpD     | tr Q5H1V1 Q5H1V1_XANOR Membrane proteins related to metalloendopeptidases OS=Xanthomonas oryzae pv. oryzae (strain KACC10331 / KXO85) GN=NlpD PE=4 SV=1  | 0.0002 | 3.2898 |
| dsbA     | sp O52376 DSBA_PSESM Thiol:disulfide interchange protein DsbA OS=Pseudomonas syringae pv. tomato (strain DC3000) GN=dsbA PE=3 SV=1                       | 0.0023 | 3.2958 |

|               |                                                                                                                                                                       |        |        |
|---------------|-----------------------------------------------------------------------------------------------------------------------------------------------------------------------|--------|--------|
| aprE          | tr M4WLM8 M4WLM8_XANCI Subtilisin-like serine protease OS=Xanthomonas citri subsp. citri Aw12879 GN=aprE PE=4 SV=1                                                    | 0.0325 | 3.3025 |
| malR          | sp P72396 MALR_STRCO HTH-type transcriptional regulator MalR OS=Streptomyces coelicolor (strain ATCC BAA-471 / A3(2) / M145) GN=malR PE=3 SV=2                        | 0.0188 | 3.3112 |
| radA          | sp Q92F42 RADA_LISIN DNA repair protein RadA homolog OS=Listeria innocua serovar 6a (strain CLIP 11262) GN=radA PE=3 SV=1                                             | 0.0039 | 3.3130 |
| XCR_3876      | tr G0CGM5 G0CGM5_XANCA Cellulase OS=Xanthomonas campestris pv. raphani 756C GN=XCR_3876 PE=3 SV=1                                                                     | 0.0103 | 3.3348 |
| btuB          | sp Q8DD41 BTUB_VIBVU Vitamin B12 transporter BtuB OS=Vibrio vulnificus (strain CMCP6) GN=btuB PE=3 SV=1                                                               | 0.0108 | 3.3489 |
| XCC0449       | tr Q8PD91 Q8PD91_XANCP Lytic enzyme OS=Xanthomonas campestris pv. campestris (strain ATCC 33913 / NCPPB 528 / LMG 568) GN=XCC0449 PE=4 SV=1                           | 0.0332 | 3.3511 |
| Shewmr4_2217  | sp Q0HI27 NDPA_SHESM Nucleoid-associated protein Shewmr4_2217 OS=Shewanella sp. (strain MR-4) GN=Shewmr4_2217 PE=3 SV=1                                               | 0.0008 | 3.3549 |
| glgX          | sp A8GKU9 GLGX_SERP5 Glycogen debranching enzyme OS=Serratia proteamaculans (strain 568) GN=glgX PE=3 SV=1                                                            | 0.0419 | 3.3631 |
| nadE          | sp Q9PC24 NADE_XYLFA Probable glutamine-dependent NAD(+) synthetase OS=Xylella fastidiosa (strain 9a5c) GN=nadE PE=3 SV=1                                             | 0.0174 | 3.3652 |
| oar           | tr M4VWL2 M4VWL2_XANCI Oar protein OS=Xanthomonas citri subsp. citri Aw12879 GN=oar PE=4 SV=1                                                                         | 0.0003 | 3.3744 |
| XCC3103       | tr Q8P669 Q8P669_XANCP Uncharacterized protein OS=Xanthomonas campestris pv. campestris (strain ATCC 33913 / NCPPB 528 / LMG 568) GN=XCC3103 PE=4 SV=1                | 0.0060 | 3.3811 |
| mgtE          | tr Q8P3S9 Q8P3S9_XANCP Magnesium transporter MgtE OS=Xanthomonas campestris pv. campestris (strain ATCC 33913 / NCPPB 528 / LMG 568) GN=mgtE PE=3 SV=1                | 0.0218 | 3.3952 |
| treA          | sp Q8P519 TREA_XANCP Periplasmic trehalase OS=Xanthomonas campestris pv. campestris (strain ATCC 33913 / NCPPB 528 / LMG 568) GN=treA PE=3 SV=1                       | 0.0068 | 3.4056 |
| yhdF          | sp O07575 YHDF_BACSU Uncharacterized oxidoreductase YhdF OS=Bacillus subtilis (strain 168) GN=yhdF PE=3 SV=1                                                          | 0.0023 | 3.4130 |
| lly           | sp Q5ZT84 LLY_LEGPH 4-hydroxyphenylpyruvate dioxygenase OS=Legionella pneumophila subsp. pneumophila (strain Philadelphia 1 / ATCC 33152 / DSM 7513) GN=lly PE=1 SV=2 | 0.0113 | 3.4284 |
| SPCC13B11.04c | sp O74540 FADH2_SCHPO Putative S-(hydroxymethyl)glutathione dehydrogenase 2 OS=Schizosaccharomyces pombe (strain 972 / ATCC 24843) GN=SPCC13B11.04c PE=3 SV=2         | 0.0062 | 3.4309 |
| NA            | sp P55177 YAG5_STAAU Hydrolase in agr operon OS=Staphylococcus aureus PE=3 SV=1                                                                                       | 0.0187 | 3.4312 |
| pep           | tr B0RNJ4 B0RNJ4_XANCB Pep protein OS=Xanthomonas campestris pv. campestris (strain B100) GN=pep PE=4 SV=1                                                            | 0.0146 | 3.4318 |
| tsf           | sp Q87A70 EFTS_XYLFT Elongation factor Ts OS=Xylella fastidiosa (strain Temecula1 / ATCC 700964) GN=tsf PE=3 SV=1                                                     | 0.0083 | 3.4567 |
| ubiG          | sp Q8P8H2 UBIG_XANCP Ubiquinone biosynthesis O-methyltransferase OS=Xanthomonas campestris pv. campestris (strain ATCC 33913 / NCPPB 528 / LMG 568) GN=ubiG PE=3 SV=1 | 0.0137 | 3.5042 |
| serA          | sp P43885 SERA_HAEIN D-3-phosphoglycerate dehydrogenase OS=Haemophilus influenzae (strain ATCC 51907 / DSM 11121 / KW20 / Rd) GN=serA PE=3 SV=1                       | 0.0223 | 3.5050 |

|            |                                                                                                                                                                                              |        |        |
|------------|----------------------------------------------------------------------------------------------------------------------------------------------------------------------------------------------|--------|--------|
| NGR_a02410 | sp P55577 Y4NA_RHISN Uncharacterized peptidase y4nA OS=Rhizobium sp. (strain NGR234) GN=NGR_a02410 PE=3 SV=1                                                                                 | 0.0121 | 3.5104 |
| NA         | uncharacterized RNA                                                                                                                                                                          | 0.0277 | 3.5179 |
| fadB       | tr Q8PB58 Q8PB58_XANCP 3-hydroxyacyl-CoA dehydrogenase OS=Xanthomonas campestris pv. campestris (strain ATCC 33913 / NCPPB 528 / LMG 568) GN=fadB PE=4 SV=1                                  | 0.0393 | 3.5211 |
| cysW       | sp P27370 CYSW_SYNE7 Sulfate transport system permease protein CysW OS=Synechococcus elongatus (strain PCC 7942) GN=cysW PE=2 SV=1                                                           | 0.0294 | 3.5684 |
| bfeA       | tr Q8P691 Q8P691_XANCP Ferric enterobactin receptor OS=Xanthomonas campestris pv. campestris (strain ATCC 33913 / NCPPB 528 / LMG 568) GN=bfeA PE=3 SV=1                                     | 0.0103 | 3.5981 |
| atpA       | sp Q3IK48 ATPA_PSEHT ATP synthase subunit alpha OS=Pseudoalteromonas haloplanktis (strain TAC 125) GN=atpA PE=3 SV=1                                                                         | 0.0114 | 3.5996 |
| katE       | sp P95539 CATE_PSEPU Catalase HP11 OS=Pseudomonas putida GN=katE PE=3 SV=1                                                                                                                   | 0.0011 | 3.6384 |
| mrcA       | sp Q9PGD4 PBPA_XYLFA Penicillin-binding protein 1A OS=Xylella fastidiosa (strain 9a5c) GN=mrcA PE=3 SV=2                                                                                     | 0.0187 | 3.6435 |
| pilA       | tr B0RPQ2 B0RPQ2_XANCB PilA protein OS=Xanthomonas campestris pv. campestris (strain B100) GN=pilA PE=3 SV=1                                                                                 | 0.0002 | 3.6560 |
| rpsT       | sp Q8PBG9 RS20_XANCP 30S ribosomal protein S20 OS=Xanthomonas campestris pv. campestris (strain ATCC 33913 / NCPPB 528 / LMG 568) GN=rpsT PE=3 SV=1                                          | 0.0009 | 3.6806 |
| pilE       | tr Q5H2I1 Q5H2I1_XANOR Pilin OS=Xanthomonas oryzae pv. oryzae (strain KACC10331 / KXO85) GN=pilE PE=3 SV=1                                                                                   | 0.0016 | 3.6825 |
| coaX       | sp Q8P3Y1 COAX_XANCP Type III pantothenate kinase OS=Xanthomonas campestris pv. campestris (strain ATCC 33913 / NCPPB 528 / LMG 568) GN=coaX PE=3 SV=1                                       | 0.0000 | 3.7276 |
| XCAW_00467 | tr M4WBU1 M4WBU1_XANCI Distinct helicase family with a unique C-terminal domain including a metal-binding cysteine cluster OS=Xanthomonas citri subsp. citri Aw12879 GN=XCAW_00467 PE=4 SV=1 | 0.0414 | 3.7430 |
| recA       | sp B8GQV3 RECA_THISH Protein RecA OS=Thioalkalivibrio sulfidophilus (strain HL-EbGR7) GN=recA PE=3 SV=1                                                                                      | 0.0049 | 3.7452 |
| radA       | sp Q9KGG1 RADA_BACHD DNA repair protein RadA homolog OS=Bacillus halodurans (strain ATCC BAA-125 / DSM 18197 / FERM 7344 / JCM 9153 / C-125) GN=radA PE=3 SV=1                               | 0.0012 | 3.7728 |
| XCC2020    | tr Q8P946 Q8P946_XANCP Uncharacterized protein OS=Xanthomonas campestris pv. campestris (strain ATCC 33913 / NCPPB 528 / LMG 568) GN=XCC2020 PE=4 SV=1                                       | 0.0195 | 3.7930 |
| trpE       | sp P20579 TRPE_PSEPU Anthranilate synthase component 1 OS=Pseudomonas putida GN=trpE PE=3 SV=1                                                                                               | 0.0028 | 3.9119 |
| metB       | tr G7TB12 G7TB12_XANOB Cystathionine gamma-lyase-like protein OS=Xanthomonas oryzae pv. oryzicola (strain BLS256) GN=metB PE=3 SV=1                                                          | 0.0005 | 3.9209 |
| CA_C2800   | sp Q97FE0 MCAT_CLOAB Probable manganese catalase OS=Clostridium acetobutylicum (strain ATCC 824 / DSM 792 / JCM 1419 / LMG 5710 / VKM B-1787) GN=CA_C2800 PE=3 SV=1                          | 0.0000 | 3.9434 |
| recX       | sp Q8P9X1 RECX_XANCP Regulatory protein RecX OS=Xanthomonas campestris pv. campestris (strain ATCC 33913 / NCPPB 528 / LMG 568) GN=recX PE=1 SV=1                                            | 0.0002 | 3.9438 |

|         |                                                                                                                                                        |        |        |
|---------|--------------------------------------------------------------------------------------------------------------------------------------------------------|--------|--------|
| argG    | sp Q8P8J4 ASSY_XANCP Argininosuccinate synthase OS=Xanthomonas campestris pv. campestris (strain ATCC 33913 / NCPPB 528 / LMG 568) GN=argG PE=3 SV=1   | 0.0000 | 4.0627 |
| ylil    | tr Q8P497 Q8P497_XANCP Dehydrogenase OS=Xanthomonas campestris pv. campestris (strain ATCC 33913 / NCPPB 528 / LMG 568) GN=ylil PE=4 SV=1              | 0.0340 | 4.0633 |
| rhIE    | tr Q8PDB5 Q8PDB5_XANCP ATP-dependent RNA helicase OS=Xanthomonas campestris pv. campestris (strain ATCC 33913 / NCPPB 528 / LMG 568) GN=rhIE PE=3 SV=1 | 0.0050 | 4.0714 |
| yeiG    | sp B1LKQ1 SFGH2_ECOSM S-formylglutathione hydrolase YeiG OS=Escherichia coli (strain SMS-3-5 / SECEC) GN=yeiG PE=3 SV=1                                | 0.0499 | 4.0967 |
| uup     | tr M4WKN0 M4WKN0_XANCI ATPase component of ABC transporter OS=Xanthomonas citri subsp. citri Aw12879 GN=uup PE=3 SV=1                                  | 0.0016 | 4.1247 |
| metB    | sp P46807 METB_MYCLE Cystathionine gamma-synthase OS=Mycobacterium leprae (strain TN) GN=metB PE=3 SV=1                                                | 0.0005 | 4.1673 |
| GSU0804 | sp Q74F05 NQOR_GEOSL NAD(P)H dehydrogenase (quinone) OS=Geobacter sulfurreducens (strain ATCC 51573 / DSM 12127 / PCA) GN=GSU0804 PE=3 SV=1            | 0.0026 | 4.1860 |
| argB    | sp Q8P8J6 ARGB_XANCP Acetylglutamate kinase OS=Xanthomonas campestris pv. campestris (strain ATCC 33913 / NCPPB 528 / LMG 568) GN=argB PE=3 SV=2       | 0.0006 | 4.4444 |
| prs     | sp A6W1C7 KPRS_MARMS Ribose-phosphate pyrophosphokinase OS=Marinomonas sp. (strain MWYL1) GN=prs PE=3 SV=1                                             | 0.0264 | 4.4639 |
| argG    | sp Q8P8J4 ASSY_XANCP Argininosuccinate synthase OS=Xanthomonas campestris pv. campestris (strain ATCC 33913 / NCPPB 528 / LMG 568) GN=argG PE=3 SV=1   | 0.0004 | 4.4897 |
| XCC1390 | tr Q8PAT7 Q8PAT7_XANCP Uncharacterized protein OS=Xanthomonas campestris pv. campestris (strain ATCC 33913 / NCPPB 528 / LMG 568) GN=XCC1390 PE=4 SV=1 | 0.0080 | 4.5211 |
| XCC0134 | tr Q8PE49 Q8PE49_XANCP Trehalose synthase OS=Xanthomonas campestris pv. campestris (strain ATCC 33913 / NCPPB 528 / LMG 568) GN=XCC0134 PE=4 SV=1      | 0.0018 | 4.5350 |
| metB    | sp P46807 METB_MYCLE Cystathionine gamma-synthase OS=Mycobacterium leprae (strain TN) GN=metB PE=3 SV=1                                                | 0.0000 | 4.7209 |
| gumJ    | tr Q8P805 Q8P805_XANCP GumJ protein OS=Xanthomonas campestris pv. campestris (strain ATCC 33913 / NCPPB 528 / LMG 568) GN=gumJ PE=4 SV=1               | 0.0164 | 4.8616 |
| XCC0335 | tr Q7CLW1 Q7CLW1_XANCP Uncharacterized protein OS=Xanthomonas campestris pv. campestris (strain ATCC 33913 / NCPPB 528 / LMG 568) GN=XCC0335 PE=4 SV=1 | 0.0013 | 5.0873 |
| sbp     | tr B0RU36 B0RU36_XANCB Sbp protein OS=Xanthomonas campestris pv. campestris (strain B100) GN=sbp PE=4 SV=1                                             | 0.0000 | 5.0991 |
| XCC2730 | tr Q8P783 Q8P783_XANCP Alcohol dehydrogenase OS=Xanthomonas campestris pv. campestris (strain ATCC 33913 / NCPPB 528 / LMG 568) GN=XCC2730 PE=4 SV=1   | 0.0001 | inf    |
