# Supplementary material for: Transcriptomic Reprograming of Xanthomonas campestris pv. campestris after Treatment with Hydrolytic Products Derived from Glucosinolates
Source: MDPI journal article supplement (doi:10.3390/plants10081656), 2021-08-11
Supplement: s1 [file s1]

Table S3. Primers used for RT-qPCR

| Gene                                                | Forward primer       | Left primer           |
|-----------------------------------------------------|----------------------|-----------------------|
| Cell division protein (ftsX)                        | atcgaccacatctgcaca   | agattgatttcgcgcgactg  |
| Chaperone protein (dnaK)                            | gtgaccaacccgaagaacac | tcggcggtcttcttcatctt  |
| Chromosomal replication initiator protein (dnaA)    | acacctttgccaacttcgtg | gctgaagaactgttccgagc  |
| Regulatory protein (recX)                           | ctggaccgaaaacgcactc  | ctcaaggctcgaagcgtgttg |
| Periplasmic trehalase (treA)                        | cgcgaggtgtattactggga | tcaggtagtaggtgcggttg  |
| Enolase (eno)                                       | ttccattcgctgaagtcggt | ccaggttgacttgccgttg   |
| Acetyl-coenzyme A synthetase (acsA)                 | aggacgacatctactggtgc | aagatggtgacctggtgctt  |
| Succinate dehydrogenase flavoprotein subunit (sdhA) | ggacctgatcgagacctacg | gtgaccagtgtgtgcttctg  |
| ATP synthase subunit alpha (atpA)                   | cgaatacttcatggaccgcg | cttctccacgtactcctcgg  |
| LPS-assembly protein (lptD)                         | agcagaccatcgaacaagga | caatgaggttgcgacggtag  |
| Protein translocase (secD)                          | aacagcatccaggtctcgtt | cagtgcattgaccggttac   |
| Glutathione transferase (gst1)                      | tacatgttcccaagcggat  | atccaactccgggtaatgcc  |
| DNA gyrase subunit B (gyrB)                         | taccaccgcatcatcctg   | gctgtatctcaaggac      |
