# Supplementary material for: Transcriptomic Reprograming of Xanthomonas campestris pv. campestris after Treatment with Hydrolytic Products Derived from Glucosinolates
Source: MDPI journal article supplement (doi:10.3390/plants10081656), 2021-08-11
Supplement: s1 [file s1]

| List of down-regulated DEGs in the comparison AITCvsControl |                                                                                                                                                                               |        |         |
|-------------------------------------------------------------|-------------------------------------------------------------------------------------------------------------------------------------------------------------------------------|--------|---------|
| Gene                                                        | Description                                                                                                                                                                   | fdr    | log2fc  |
| cydA                                                        | tr Q8P8K8 Q8P8K8_XANCP Cytochrome D ubiquinol oxidase subunit I OS=Xanthomonas campestris pv. campestris (strain ATCC 33913 / NCPPB 528 / LMG 568) GN=cydA PE=4 SV=1          | 0.0001 | -2.4646 |
| fprB                                                        | sp O33064 FPRB_MYCLE Probable ferredoxin/ferredoxin--NADP reductase OS=Mycobacterium leprae (strain TN) GN=fprB PE=3 SV=1                                                     | 0.0001 | -2.3363 |
| dnaK                                                        | sp B2GGP0 DNAK_KOCD Chaperone protein DnaK OS=Kocuria rhizophila (strain ATCC 9341 / DSM 348 / NBRC 103217 / DC2201) GN=dnaK PE=3 SV=1                                        | 0.0001 | -2.1019 |
| sir                                                         | sp Q7TYP6 SIR_MYCBO Sulfite reductase [ferredoxin] OS=Mycobacterium bovis (strain ATCC BAA-935 / AF2122/97) GN=sir PE=3 SV=2                                                  | 0.0005 | -2.0521 |
| sir                                                         | sp Q7TYP6 SIR_MYCBO Sulfite reductase [ferredoxin] OS=Mycobacterium bovis (strain ATCC BAA-935 / AF2122/97) GN=sir PE=3 SV=2                                                  | 0.0007 | -1.9709 |
| sir                                                         | sp Q7TYP6 SIR_MYCBO Sulfite reductase [ferredoxin] OS=Mycobacterium bovis (strain ATCC BAA-935 / AF2122/97) GN=sir PE=3 SV=2                                                  | 0.0006 | -1.9579 |
| sir                                                         | sp Q7TYP6 SIR_MYCBO Sulfite reductase [ferredoxin] OS=Mycobacterium bovis (strain ATCC BAA-935 / AF2122/97) GN=sir PE=3 SV=2                                                  | 0.0008 | -1.9403 |
| dnaK                                                        | sp B2GGP0 DNAK_KOCD Chaperone protein DnaK OS=Kocuria rhizophila (strain ATCC 9341 / DSM 348 / NBRC 103217 / DC2201) GN=dnaK PE=3 SV=1                                        | 0.0028 | -1.6027 |
| gabT                                                        | sp P40829 GABT_MYCLE 4-aminobutyrate aminotransferase OS=Mycobacterium leprae (strain TN) GN=gabT PE=3 SV=1                                                                   | 0.0016 | -1.4717 |
| araG                                                        | sp Q9K7C3 ARAG_BACHD L-arabinose transport ATP-binding protein AraG OS=Bacillus halodurans (strain ATCC BAA-125 / DSM 18197 / FERM 7344 / JCM 9153 / C-125) GN=araG PE=3 SV=1 | 0.0045 | -1.3665 |
| pstS                                                        | sp Q9PBK3 PSTS_XYLFA Phosphate-binding protein PstS OS=Xylella fastidiosa (strain 9a5c) GN=pstS PE=3 SV=1                                                                     | 0.0074 | -1.2154 |
| fadA                                                        | sp Q5E8X7 FADA_VIBF1 3-ketoacyl-CoA thiolase OS=Vibrio fischeri (strain ATCC 700601 / ES114) GN=fadA PE=3 SV=2                                                                | 0.0019 | -1.1740 |
| yhdF                                                        | sp O07575 YHDF_BACSU Uncharacterized oxidoreductase YhdF OS=Bacillus subtilis (strain 168) GN=yhdF PE=3 SV=1                                                                  | 0.0007 | -1.1377 |
| chvE                                                        | sp P25548 CHVE_AGRT5 Multiple sugar-binding periplasmic receptor ChvE OS=Agrobacterium tumefaciens (strain C58 / ATCC 33970) GN=chvE PE=1 SV=2                                | 0.0000 | -1.0631 |
| sir                                                         | sp Q7TYP6 SIR_MYCBO Sulfite reductase [ferredoxin] OS=Mycobacterium bovis (strain ATCC BAA-935 / AF2122/97) GN=sir PE=3 SV=2                                                  | 0.0045 | -1.0589 |
| SPCC965.06                                                  | sp O59826 KCAB_SCHPO Putative voltage-gated potassium channel subunit beta OS=Schizosaccharomyces pombe (strain 972 / ATCC 24843) GN=SPCC965.06 PE=3 SV=1                     | 0.0014 | -1.0233 |

|                                                                   |                                                                                                                                                                      |        |         |
|-------------------------------------------------------------------|----------------------------------------------------------------------------------------------------------------------------------------------------------------------|--------|---------|
| cydA                                                              | tr Q8P8K8 Q8P8K8_XANCP Cytochrome D ubiquinol oxidase subunit I OS=Xanthomonas campestris pv. campestris (strain ATCC 33913 / NCPPB 528 / LMG 568) GN=cydA PE=4 SV=1 | 0.0026 | -1.0130 |
| hpaH                                                              | sp A4IT51 HPAH_GEOTN Anthranilate 3-monooxygenase oxygenase component OS=Geobacillus thermodenitrificans (strain NG80-2) GN=hpaH PE=1 SV=1                           | 0.0010 | -0.9880 |
|                                                                   |                                                                                                                                                                      |        |         |
|                                                                   |                                                                                                                                                                      |        |         |
| <b>List of down-regulated DEGs in the comparison I3CvsControl</b> |                                                                                                                                                                      |        |         |
| Gene                                                              | Description                                                                                                                                                          | fdr    | log2fc  |
| P                                                                 | sp P17394 DPOL_HBV B1 Protein P OS=Hepatitis B virus genotype B1 subtype adw (isolate Japan/pJDW233/1988) GN=P PE=3 SV=1                                             | 0.0013 | -9.0488 |
| P                                                                 | sp P03158 DPOL_HBVA2 Protein P OS=Hepatitis B virus genotype A2 subtype adw (isolate Japan/Nishioka/1983) GN=P PE=3 SV=2                                             | 0.0043 | -7.7522 |
| rpsN                                                              | sp A0K1X4 RS14_ARTS2 30S ribosomal protein S14 OS=Arthrobacter sp. (strain FB24) GN=rpsN PE=3 SV=1                                                                   | 0.0000 | -3.3717 |
| rpsE                                                              | sp A0JZ68 RS5_ARTS2 30S ribosomal protein S5 OS=Arthrobacter sp. (strain FB24) GN=rpsE PE=3 SV=1                                                                     | 0.0000 | -3.3329 |
| glnA                                                              | sp P15106 GLNA_STRCO Glutamine synthetase OS=Streptomyces coelicolor (strain ATCC BAA-471 / A3(2) / M145) GN=glnA PE=2 SV=1                                          | 0.0000 | -3.1903 |
| rplM                                                              | sp A9WMG0 RL13_RENSM 50S ribosomal protein L13 OS=Renibacterium salmoninarum (strain ATCC 33209 / DSM 20767 / JCM 11484 / NBRC 15589 / NCIMB 2235) GN=rplM PE=3 SV=1 | 0.0000 | -3.0214 |
| sdhA                                                              | sp Q1RHB9 SDHA_RICBR Succinate dehydrogenase flavoprotein subunit OS=Rickettsia bellii (strain RML369-C) GN=sdhA PE=3 SV=1                                           | 0.0000 | -3.0194 |
| fusA                                                              | sp Q0SFF3 EFG_RHOJR Elongation factor G OS=Rhodococcus jostii (strain RHA1) GN=fusA PE=3 SV=1                                                                        | 0.0000 | -2.9591 |
| fusA                                                              | sp Q0SFF3 EFG_RHOJR Elongation factor G OS=Rhodococcus jostii (strain RHA1) GN=fusA PE=3 SV=1                                                                        | 0.0000 | -2.9409 |
| ftsX                                                              | sp O32882 FTSX_MYCLE Cell division protein FtsX OS=Mycobacterium leprae (strain TN) GN=ftsX PE=3 SV=2                                                                | 0.0000 | -2.9011 |
| fusA                                                              | sp Q0SFF3 EFG_RHOJR Elongation factor G OS=Rhodococcus jostii (strain RHA1) GN=fusA PE=3 SV=1                                                                        | 0.0000 | -2.9003 |
| sdhA                                                              | sp Q1RHB9 SDHA_RICBR Succinate dehydrogenase flavoprotein subunit OS=Rickettsia bellii (strain RML369-C) GN=sdhA PE=3 SV=1                                           | 0.0000 | -2.8587 |
| atpA                                                              | sp A0JY66 ATPA_ARTS2 ATP synthase subunit alpha OS=Arthrobacter sp. (strain FB24) GN=atpA PE=3 SV=2                                                                  | 0.0000 | -2.7353 |
| atpA                                                              | sp A0JY66 ATPA_ARTS2 ATP synthase subunit alpha OS=Arthrobacter sp. (strain FB24) GN=atpA PE=3 SV=2                                                                  | 0.0000 | -2.6966 |

|                 |                                                                                                                                                                                           |        |         |
|-----------------|-------------------------------------------------------------------------------------------------------------------------------------------------------------------------------------------|--------|---------|
| SAU060112_90002 | tr A0A090M192 A0A090M192_STAAU Putative cytoplasmic protein OS=Staphylococcus aureus GN=SAU060112_90002 PE=4 SV=1                                                                         | 0.0000 | -2.6409 |
| HMPREF1043_0706 | tr I0S7Z1 I0S7Z1_STRAP Uncharacterized protein OS=Streptococcus anginosus subsp. whileyi CCUG 39159 GN=HMPREF1043_0706 PE=4 SV=1                                                          | 0.0000 | -2.6225 |
| rpsN            | sp A0K1X4 RS14_ARTS2 30S ribosomal protein S14 OS=Arthrobacter sp. (strain FB24) GN=rpsN PE=3 SV=1                                                                                        | 0.0000 | -2.6123 |
| ctaD1           | sp Q9X813 COX1A_STRCO Probable cytochrome c oxidase subunit 1-alpha OS=Streptomyces coelicolor (strain ATCC BAA-471 / A3(2) / M145) GN=ctaD1 PE=3 SV=1                                    | 0.0000 | -2.6054 |
| hisC            | sp Q47QS8 HIS8_THEFY Histidinol-phosphate aminotransferase OS=Thermobifida fusca (strain YX) GN=hisC PE=3 SV=1                                                                            | 0.0000 | -2.5716 |
| pyk             | sp Q8FP04 KPYK_COREF Pyruvate kinase OS=Corynebacterium efficiens (strain DSM 44549 / YS-314 / AJ 12310 / JCM 11189 / NBRC 100395) GN=pyk PE=3 SV=2                                       | 0.0000 | -2.4520 |
| sucC            | sp B8HDC2 SUCC_ARTCA Succinyl-CoA ligase [ADP-forming] subunit beta OS=Arthrobacter chlorophenolicus (strain ATCC 700700 / DSM 12829 / JCM 12360 / NCIMB 13794 / A6) GN=sucC PE=3 SV=1    | 0.0000 | -2.3906 |
| sucC            | sp A9WKU9 SUCC_RENSM Succinyl-CoA ligase [ADP-forming] subunit beta OS=Renibacterium salmoninarum (strain ATCC 33209 / DSM 20767 / JCM 11484 / NBRC 15589 / NCIMB 2235) GN=sucC PE=3 SV=1 | 0.0000 | -2.3624 |
| sucC            | sp A9WKU9 SUCC_RENSM Succinyl-CoA ligase [ADP-forming] subunit beta OS=Renibacterium salmoninarum (strain ATCC 33209 / DSM 20767 / JCM 11484 / NBRC 15589 / NCIMB 2235) GN=sucC PE=3 SV=1 | 0.0000 | -2.3512 |
| sucC            | sp A9WKU9 SUCC_RENSM Succinyl-CoA ligase [ADP-forming] subunit beta OS=Renibacterium salmoninarum (strain ATCC 33209 / DSM 20767 / JCM 11484 / NBRC 15589 / NCIMB 2235) GN=sucC PE=3 SV=1 | 0.0000 | -2.3109 |
| rpsB            | sp A0JUP1 RS2_ARTS2 30S ribosomal protein S2 OS=Arthrobacter sp. (strain FB24) GN=rpsB PE=3 SV=1                                                                                          | 0.0000 | -2.3073 |
| rpsB            | sp A0JUP1 RS2_ARTS2 30S ribosomal protein S2 OS=Arthrobacter sp. (strain FB24) GN=rpsB PE=3 SV=1                                                                                          | 0.0000 | -2.2859 |
| sucC            | sp A9WKU9 SUCC_RENSM Succinyl-CoA ligase [ADP-forming] subunit beta OS=Renibacterium salmoninarum (strain ATCC 33209 / DSM 20767 / JCM 11484 / NBRC 15589 / NCIMB 2235) GN=sucC PE=3 SV=1 | 0.0000 | -2.2774 |
| rpsB            | sp A0JUP1 RS2_ARTS2 30S ribosomal protein S2 OS=Arthrobacter sp. (strain FB24) GN=rpsB PE=3 SV=1                                                                                          | 0.0000 | -2.2742 |
| rpsB            | sp A0JUP1 RS2_ARTS2 30S ribosomal protein S2 OS=Arthrobacter sp. (strain FB24) GN=rpsB PE=3 SV=1                                                                                          | 0.0000 | -2.2455 |
| rpsB            | sp A0JUP1 RS2_ARTS2 30S ribosomal protein S2 OS=Arthrobacter sp. (strain FB24) GN=rpsB PE=3 SV=1                                                                                          | 0.0000 | -2.2213 |
| rpsB            | sp A0JUP1 RS2_ARTS2 30S ribosomal protein S2 OS=Arthrobacter sp. (strain FB24) GN=rpsB PE=3 SV=1                                                                                          | 0.0000 | -2.2208 |
| rpsB            | sp A0JUP1 RS2_ARTS2 30S ribosomal protein S2 OS=Arthrobacter sp. (strain FB24) GN=rpsB PE=3 SV=1                                                                                          | 0.0000 | -2.1976 |
| atpA            | sp A0JY66 ATPA_ARTS2 ATP synthase subunit alpha OS=Arthrobacter sp. (strain FB24) GN=atpA PE=3 SV=2                                                                                       | 0.0000 | -2.1755 |
| atpA            | sp A0JY66 ATPA_ARTS2 ATP synthase subunit alpha OS=Arthrobacter sp. (strain FB24) GN=atpA PE=3 SV=2                                                                                       | 0.0000 | -2.1632 |

|       |                                                                                                                                                                      |        |         |
|-------|----------------------------------------------------------------------------------------------------------------------------------------------------------------------|--------|---------|
| atpA  | sp A0JY66 ATPA_ARTS2 ATP synthase subunit alpha OS=Arthrobacter sp. (strain FB24) GN=atpA PE=3 SV=2                                                                  | 0.0000 | -2.1625 |
| qcrB  | sp Q9X806 QCRB_STRCO Ubiquinol-cytochrome c reductase cytochrome b subunit OS=Streptomyces coelicolor (strain ATCC BAA-471 / A3(2) / M145) GN=qcrB PE=3 SV=1         | 0.0000 | -2.1527 |
| atpA  | sp A0JY66 ATPA_ARTS2 ATP synthase subunit alpha OS=Arthrobacter sp. (strain FB24) GN=atpA PE=3 SV=2                                                                  | 0.0000 | -2.1448 |
| fprB  | sp O33064 FPRB_MYCLE Probable ferredoxin/ferredoxin--NADP reductase OS=Mycobacterium leprae (strain TN) GN=fprB PE=3 SV=1                                            | 0.0000 | -2.1381 |
| atpA  | sp A0JY66 ATPA_ARTS2 ATP synthase subunit alpha OS=Arthrobacter sp. (strain FB24) GN=atpA PE=3 SV=2                                                                  | 0.0000 | -2.1248 |
| rpsB  | sp A0JUP1 RS2_ARTS2 30S ribosomal protein S2 OS=Arthrobacter sp. (strain FB24) GN=rpsB PE=3 SV=1                                                                     | 0.0000 | -2.1173 |
| atpA  | sp A0JY66 ATPA_ARTS2 ATP synthase subunit alpha OS=Arthrobacter sp. (strain FB24) GN=atpA PE=3 SV=2                                                                  | 0.0000 | -2.1150 |
| rpsB  | sp A0JUP1 RS2_ARTS2 30S ribosomal protein S2 OS=Arthrobacter sp. (strain FB24) GN=rpsB PE=3 SV=1                                                                     | 0.0000 | -2.0897 |
| dnaK  | sp B2GGP0 DNAK_KOCDR Chaperone protein DnaK OS=Kocuria rhizophila (strain ATCC 9341 / DSM 348 / NBRC 103217 / DC2201) GN=dnaK PE=3 SV=1                              | 0.0000 | -2.0796 |
| atpA  | sp A0JY66 ATPA_ARTS2 ATP synthase subunit alpha OS=Arthrobacter sp. (strain FB24) GN=atpA PE=3 SV=2                                                                  | 0.0000 | -2.0762 |
| atpA  | sp A0JY66 ATPA_ARTS2 ATP synthase subunit alpha OS=Arthrobacter sp. (strain FB24) GN=atpA PE=3 SV=2                                                                  | 0.0000 | -2.0761 |
| typA  | sp P57508 TYPA_BUCAI GTP-binding protein TypA/BipA homolog OS=Buchnera aphidicola subsp. Acyrthosiphon pisum (strain APS) GN=typA PE=3 SV=1                          | 0.0000 | -2.0510 |
| rpsB  | sp A0JUP1 RS2_ARTS2 30S ribosomal protein S2 OS=Arthrobacter sp. (strain FB24) GN=rpsB PE=3 SV=1                                                                     | 0.0000 | -2.0425 |
| cheB2 | sp Q6LTM2 CHEB2_PHOPR Chemotaxis response regulator protein-glutamate methylesterase 2 OS=Photobacterium profundum GN=cheB2 PE=3 SV=1                                | 0.0000 | -2.0207 |
| rpsB  | sp A0JUP1 RS2_ARTS2 30S ribosomal protein S2 OS=Arthrobacter sp. (strain FB24) GN=rpsB PE=3 SV=1                                                                     | 0.0000 | -2.0196 |
| typA  | sp P57508 TYPA_BUCAI GTP-binding protein TypA/BipA homolog OS=Buchnera aphidicola subsp. Acyrthosiphon pisum (strain APS) GN=typA PE=3 SV=1                          | 0.0000 | -2.0067 |
| nrdE1 | sp P0CG99 RIR1A_MYCS2 Ribonucleoside-diphosphate reductase subunit alpha 1 OS=Mycobacterium smegmatis (strain ATCC 700084 / mc(2)155) GN=nrdE1 PE=1 SV=1             | 0.0000 | -2.0020 |
| rplM  | sp A9WMG0 RL13_RENSM 50S ribosomal protein L13 OS=Renibacterium salmoninarum (strain ATCC 33209 / DSM 20767 / JCM 11484 / NBRC 15589 / NCIMB 2235) GN=rplM PE=3 SV=1 | 0.0000 | -1.9943 |
| typA  | sp P57508 TYPA_BUCAI GTP-binding protein TypA/BipA homolog OS=Buchnera aphidicola subsp. Acyrthosiphon pisum (strain APS) GN=typA PE=3 SV=1                          | 0.0000 | -1.9914 |
| rpsB  | sp A0JUP1 RS2_ARTS2 30S ribosomal protein S2 OS=Arthrobacter sp. (strain FB24) GN=rpsB PE=3 SV=1                                                                     | 0.0000 | -1.9896 |

|           |                                                                                                                                                                               |        |         |
|-----------|-------------------------------------------------------------------------------------------------------------------------------------------------------------------------------|--------|---------|
| typA      | sp P57508 TYPA_BUCAI GTP-binding protein TypA/BipA homolog OS=Buchnera aphidicola subsp. Acyrthosiphon pisum (strain APS) GN=typA PE=3 SV=1                                   | 0.0000 | -1.9887 |
| NA        | sp Q51945 TTUC_PSEPU Tartrate dehydrogenase/decarboxylase OS=Pseudomonas putida PE=1 SV=3                                                                                     | 0.0000 | -1.9589 |
| typA      | sp P57508 TYPA_BUCAI GTP-binding protein TypA/BipA homolog OS=Buchnera aphidicola subsp. Acyrthosiphon pisum (strain APS) GN=typA PE=3 SV=1                                   | 0.0000 | -1.9345 |
| araG      | sp Q9K7C3 ARAG_BACHD L-arabinose transport ATP-binding protein AraG OS=Bacillus halodurans (strain ATCC BAA-125 / DSM 18197 / FERM 7344 / JCM 9153 / C-125) GN=araG PE=3 SV=1 | 0.0000 | -1.9199 |
| Mb2838c   | sp P59800 TRA9_MYCBO Putative transposase for insertion sequence element IS986/IS6110 OS=Mycobacterium bovis (strain ATCC BAA-935 / AF2122/97) GN=Mb2838c PE=3 SV=1           | 0.0000 | -1.8907 |
| Achl_0442 | tr B8HAI0 B8HAI0_ARTCA Tartrate dehydrogenase OS=Arthrobacter chlorophenolicus (strain ATCC 700700 / DSM 12829 / JCM 12360 / NCIMB 13794 / A6) GN=Achl_0442 PE=3 SV=1         | 0.0001 | -1.8889 |
| YLR154C-G | sp Q3E813 YL154_YEAST Uncharacterized protein YLR154C-G OS=Saccharomyces cerevisiae (strain ATCC 204508 / S288c) GN=YLR154C-G PE=2 SV=1                                       | 0.0023 | -1.8858 |
| parB      | sp Q50201 PARB_MYCLE Probable chromosome-partitioning protein ParB OS=Mycobacterium leprae (strain TN) GN=parB PE=3 SV=1                                                      | 0.0000 | -1.8738 |
| infB      | sp A9WPV8 IF2_RENSM Translation initiation factor IF-2 OS=Renibacterium salmoninarum (strain ATCC 33209 / DSM 20767 / JCM 11484 / NBRC 15589 / NCIMB 2235) GN=infB PE=3 SV=1  | 0.0000 | -1.8648 |
| napA      | sp P81186 NAPA_DESDA Periplasmic nitrate reductase OS=Desulfovibrio desulfuricans (strain ATCC 27774 / DSM 6949) GN=napA PE=1 SV=2                                            | 0.0000 | -1.8613 |
| groL2     | sp A9WN14 CH602_RENSM 60 kDa chaperonin 2 OS=Renibacterium salmoninarum (strain ATCC 33209 / DSM 20767 / JCM 11484 / NBRC 15589 / NCIMB 2235) GN=groL2 PE=3 SV=1              | 0.0000 | -1.8392 |
| rplI      | sp A0K2H2 RL9_ARTS2 50S ribosomal protein L9 OS=Arthrobacter sp. (strain FB24) GN=rplI PE=3 SV=1                                                                              | 0.0000 | -1.8104 |
| sir       | sp Q7TYP6 SIR_MYCBO Sulfite reductase [ferredoxin] OS=Mycobacterium bovis (strain ATCC BAA-935 / AF2122/97) GN=sir PE=3 SV=2                                                  | 0.0000 | -1.7714 |
| sir       | sp Q7TYP6 SIR_MYCBO Sulfite reductase [ferredoxin] OS=Mycobacterium bovis (strain ATCC BAA-935 / AF2122/97) GN=sir PE=3 SV=2                                                  | 0.0000 | -1.7701 |
| cynT      | sp A0R566 CYNT_MYCS2 Carbonic anhydrase OS=Mycobacterium smegmatis (strain ATCC 700084 / mc(2)155) GN=cynT PE=1 SV=1                                                          | 0.0000 | -1.7482 |
| sir       | sp Q7TYP6 SIR_MYCBO Sulfite reductase [ferredoxin] OS=Mycobacterium bovis (strain ATCC BAA-935 / AF2122/97) GN=sir PE=3 SV=2                                                  | 0.0000 | -1.7477 |

|      |                                                                                                                                                                                                                                               |        |         |
|------|-----------------------------------------------------------------------------------------------------------------------------------------------------------------------------------------------------------------------------------------------|--------|---------|
| pepA | sp C5CCM4 AMPA_MICLC Probable cytosol aminopeptidase OS=Micrococcus luteus (strain ATCC 4698 / DSM 20030 / JCM 1464 / NBRC 3333 / NCIMB 9278 / NCTC 2665 / VKM Ac-2230) GN=pepA PE=3 SV=1                                                     | 0.0000 | -1.7411 |
| sir  | sp Q7TYP6 SIR_MYCBO Sulfite reductase [ferredoxin] OS=Mycobacterium bovis (strain ATCC BAA-935 / AF2122/97) GN=sir PE=3 SV=2                                                                                                                  | 0.0000 | -1.7411 |
| sepF | sp A0JVA0 SEPF_ARTS2 Cell division protein SepF OS=Arthrobacter sp. (strain FB24) GN=sepF PE=3 SV=1                                                                                                                                           | 0.0000 | -1.7358 |
| rplA | sp B8HD24 RL1_ARTCA 50S ribosomal protein L1 OS=Arthrobacter chlorophenolicus (strain ATCC 700700 / DSM 12829 / JCM 12360 / NCIMB 13794 / A6) GN=rplA PE=3 SV=1                                                                               | 0.0000 | -1.7305 |
| atpA | sp A0JY66 ATPA_ARTS2 ATP synthase subunit alpha OS=Arthrobacter sp. (strain FB24) GN=atpA PE=3 SV=2                                                                                                                                           | 0.0000 | -1.7262 |
| atpA | sp A0JY66 ATPA_ARTS2 ATP synthase subunit alpha OS=Arthrobacter sp. (strain FB24) GN=atpA PE=3 SV=2                                                                                                                                           | 0.0000 | -1.7261 |
| mgo  | sp B8HAT7 MQO_ARTCA Probable malate:quinone oxidoreductase OS=Arthrobacter chlorophenolicus (strain ATCC 700700 / DSM 12829 / JCM 12360 / NCIMB 13794 / A6) GN=mgo PE=3 SV=1                                                                  | 0.0000 | -1.7064 |
| rplA | sp B8HD24 RL1_ARTCA 50S ribosomal protein L1 OS=Arthrobacter chlorophenolicus (strain ATCC 700700 / DSM 12829 / JCM 12360 / NCIMB 13794 / A6) GN=rplA PE=3 SV=1                                                                               | 0.0000 | -1.7005 |
| whiB | sp Q7AKN0 WHIB_STRCO Transcriptional regulator WhiB OS=Streptomyces coelicolor (strain ATCC BAA-471 / A3(2) / M145) GN=whiB PE=2 SV=1                                                                                                         | 0.0000 | -1.6981 |
| hisA | sp A9WQA3 HIS4_RENSM 1-(5-phosphoribosyl)-5-[(5-phosphoribosylamino)methylideneamino] imidazole-4-carboxamide isomerase OS=Renibacterium salmoninarum (strain ATCC 33209 / DSM 20767 / JCM 11484 / NBRC 15589 / NCIMB 2235) GN=hisA PE=3 SV=1 | 0.0000 | -1.6876 |
| dnaK | sp B2GGP0 DNAK_KOCD Chaperone protein DnaK OS=Kocuria rhizophila (strain ATCC 9341 / DSM 348 / NBRC 103217 / DC2201) GN=dnaK PE=3 SV=1                                                                                                        | 0.0000 | -1.6827 |
| pepA | sp C5CCM4 AMPA_MICLC Probable cytosol aminopeptidase OS=Micrococcus luteus (strain ATCC 4698 / DSM 20030 / JCM 1464 / NBRC 3333 / NCIMB 9278 / NCTC 2665 / VKM Ac-2230) GN=pepA PE=3 SV=1                                                     | 0.0000 | -1.6784 |
| atpA | sp A0JY66 ATPA_ARTS2 ATP synthase subunit alpha OS=Arthrobacter sp. (strain FB24) GN=atpA PE=3 SV=2                                                                                                                                           | 0.0000 | -1.6730 |
| hisA | sp A9WQA3 HIS4_RENSM 1-(5-phosphoribosyl)-5-[(5-phosphoribosylamino)methylideneamino] imidazole-4-carboxamide isomerase OS=Renibacterium salmoninarum (strain ATCC 33209 / DSM 20767 / JCM 11484 / NBRC 15589 / NCIMB 2235) GN=hisA PE=3 SV=1 | 0.0000 | -1.6615 |
| NA   | uncharacterized RNA                                                                                                                                                                                                                           | 0.0000 | -1.6613 |
| atpA | sp A0JY66 ATPA_ARTS2 ATP synthase subunit alpha OS=Arthrobacter sp. (strain FB24) GN=atpA PE=3 SV=2                                                                                                                                           | 0.0000 | -1.6506 |
| atpA | sp A0JY66 ATPA_ARTS2 ATP synthase subunit alpha OS=Arthrobacter sp. (strain FB24) GN=atpA PE=3 SV=2                                                                                                                                           | 0.0000 | -1.6458 |

|                  |                                                                                                                                                                                                                                               |        |         |
|------------------|-----------------------------------------------------------------------------------------------------------------------------------------------------------------------------------------------------------------------------------------------|--------|---------|
| hisA             | sp A9WQA3 HIS4_RENSM 1-(5-phosphoribosyl)-5-[(5-phosphoribosylamino)methylideneamino] imidazole-4-carboxamide isomerase OS=Renibacterium salmoninarum (strain ATCC 33209 / DSM 20767 / JCM 11484 / NBRC 15589 / NCIMB 2235) GN=hisA PE=3 SV=1 | 0.0000 | -1.6374 |
| sdhA             | sp Q1RHB9 SDHA_RICBR Succinate dehydrogenase flavoprotein subunit OS=Rickettsia bellii (strain RML369-C) GN=sdhA PE=3 SV=1                                                                                                                    | 0.0000 | -1.6303 |
| tkt              | sp P46708 TKT_MYCLE Transketolase OS=Mycobacterium leprae (strain TN) GN=tkt PE=3 SV=1                                                                                                                                                        | 0.0000 | -1.6291 |
| cin              | sp P21703 CIN_BPP7 DNA-invertase OS=Enterobacteria phage P7 GN=cin PE=3 SV=1                                                                                                                                                                  | 0.0000 | -1.6233 |
| atpA             | sp A0JY66 ATPA_ARTS2 ATP synthase subunit alpha OS=Arthrobacter sp. (strain FB24) GN=atpA PE=3 SV=2                                                                                                                                           | 0.0000 | -1.6224 |
| hisA             | sp A9WQA3 HIS4_RENSM 1-(5-phosphoribosyl)-5-[(5-phosphoribosylamino)methylideneamino] imidazole-4-carboxamide isomerase OS=Renibacterium salmoninarum (strain ATCC 33209 / DSM 20767 / JCM 11484 / NBRC 15589 / NCIMB 2235) GN=hisA PE=3 SV=1 | 0.0000 | -1.6102 |
| atpA             | sp A0JY66 ATPA_ARTS2 ATP synthase subunit alpha OS=Arthrobacter sp. (strain FB24) GN=atpA PE=3 SV=2                                                                                                                                           | 0.0000 | -1.6062 |
| mrcA             | sp O66874 PBPA_AQUAE Penicillin-binding protein 1A OS=Aquifex aeolicus (strain VF5) GN=mrcA PE=1 SV=1                                                                                                                                         | 0.0000 | -1.6058 |
| rplA             | sp B8HD24 RL1_ARTCA 50S ribosomal protein L1 OS=Arthrobacter chlorophenolicus (strain ATCC 700700 / DSM 12829 / JCM 12360 / NCIMB 13794 / A6) GN=rplA PE=3 SV=1                                                                               | 0.0000 | -1.6035 |
| glt1             | sp Q9C102 GLT1_SCHPO Putative glutamate synthase [NADPH] OS=Schizosaccharomyces pombe (strain 972 / ATCC 24843) GN=glt1 PE=2 SV=1                                                                                                             | 0.0000 | -1.6027 |
| glt1             | sp Q9C102 GLT1_SCHPO Putative glutamate synthase [NADPH] OS=Schizosaccharomyces pombe (strain 972 / ATCC 24843) GN=glt1 PE=2 SV=1                                                                                                             | 0.0000 | -1.5711 |
| glt1             | sp Q9C102 GLT1_SCHPO Putative glutamate synthase [NADPH] OS=Schizosaccharomyces pombe (strain 972 / ATCC 24843) GN=glt1 PE=2 SV=1                                                                                                             | 0.0000 | -1.5685 |
| glt1             | sp Q9C102 GLT1_SCHPO Putative glutamate synthase [NADPH] OS=Schizosaccharomyces pombe (strain 972 / ATCC 24843) GN=glt1 PE=2 SV=1                                                                                                             | 0.0000 | -1.5653 |
| MELLADRAFT_90342 | tr F4R8R5 F4R8R5_MELLP Putative uncharacterized protein OS=Melampsora larici-populina (strain 98AG31 / pathotype 3-4-7) GN=MELLADRAFT_90342 PE=4 SV=1                                                                                         | 0.0039 | -1.5616 |
| fumC             | sp Q9FBN6 FUMC_STRCO Fumarate hydratase class II OS=Streptomyces coelicolor (strain ATCC BAA-471 / A3(2) / M145) GN=fumC PE=3 SV=1                                                                                                            | 0.0000 | -1.5558 |
| fba              | sp Q9X8R6 ALF_STRCO Fructose-bisphosphate aldolase OS=Streptomyces coelicolor (strain ATCC BAA-471 / A3(2) / M145) GN=fba PE=3 SV=1                                                                                                           | 0.0000 | -1.5496 |
| NA               | uncharacterized RNA                                                                                                                                                                                                                           | 0.0000 | -1.5400 |

|             |                                                                                                                                                                                                  |        |         |
|-------------|--------------------------------------------------------------------------------------------------------------------------------------------------------------------------------------------------|--------|---------|
| WCM_04769   | tr L2UUH0 L2UUH0_ECOLX Uncharacterized protein (Fragment) OS=Escherichia coli KTE10 GN=WCM_04769 PE=4 SV=1                                                                                       | 0.0006 | -1.5322 |
| TSTA_040370 | tr B8MI73 B8MI73_TALSN Putative uncharacterized protein OS=Talaromyces stipitatus (strain ATCC 10500 / CBS 375.48 / QM 6759 / NRRL 1006) GN=TSTA_040370 PE=4 SV=1                                | 0.0039 | -1.5322 |
| fabG        | sp P71534 FABG_MYCS2 3-oxoacyl-[acyl-carrier-protein] reductase FabG OS=Mycobacterium smegmatis (strain ATCC 700084 / mc(2)155) GN=fabG PE=3 SV=2                                                | 0.0000 | -1.5095 |
| aceE        | sp Q89AR0 ODP1_BUCBP Pyruvate dehydrogenase E1 component OS=Buchnera aphidicola subsp. Baizongia pistaciae (strain Bp) GN=aceE PE=3 SV=1                                                         | 0.0000 | -1.5053 |
| rpoA        | sp A9WSR1 RPOA_RENSM DNA-directed RNA polymerase subunit alpha OS=Renibacterium salmoninarum (strain ATCC 33209 / DSM 20767 / JCM 11484 / NBRC 15589 / NCIMB 2235) GN=rpoA PE=3 SV=1             | 0.0000 | -1.4797 |
| thrS        | sp A0JXC7 SYT_ARTS2 Threonine--tRNA ligase OS=Arthrobacter sp. (strain FB24) GN=thrS PE=3 SV=1                                                                                                   | 0.0000 | -1.4769 |
| purL        | sp A9WV65 PURL_RENSM Phosphoribosylformylglycinamide synthase subunit PurL OS=Renibacterium salmoninarum (strain ATCC 33209 / DSM 20767 / JCM 11484 / NBRC 15589 / NCIMB 2235) GN=purL PE=3 SV=1 | 0.0000 | -1.4637 |
| gabT        | sp P40829 GABT_MYCLE 4-aminobutyrate aminotransferase OS=Mycobacterium leprae (strain TN) GN=gabT PE=3 SV=1                                                                                      | 0.0000 | -1.4481 |
| gluA        | sp P48243 GLUA_CORGL Glutamate transport ATP-binding protein GluA OS=Corynebacterium glutamicum (strain ATCC 13032 / DSM 20300 / JCM 1318 / LMG 3730 / NCIMB 10025) GN=gluA PE=3 SV=2            | 0.0000 | -1.4319 |
| gsiB        | sp Q0TJL8 GSIB_ECOL5 Glutathione-binding protein GsiB OS=Escherichia coli O6:K15:H31 (strain 536 / UPEC) GN=gsiB PE=3 SV=2                                                                       | 0.0000 | -1.4266 |
| pnp         | sp Q82K80 PNP_STRAW Polyribonucleotide nucleotidyltransferase OS=Streptomyces avermitilis (strain ATCC 31267 / DSM 46492 / JCM 5070 / NCIMB 12804 / NRRL 8165 / MA-4680) GN=pnp PE=3 SV=1        | 0.0000 | -1.4232 |
| thrS        | sp A0JXC7 SYT_ARTS2 Threonine--tRNA ligase OS=Arthrobacter sp. (strain FB24) GN=thrS PE=3 SV=1                                                                                                   | 0.0000 | -1.4032 |
| tri1        | sp Q9RDE2 TRI1_STRCO Tricorn protease homolog 1 OS=Streptomyces coelicolor (strain ATCC BAA-471 / A3(2) / M145) GN=tri1 PE=1 SV=1                                                                | 0.0000 | -1.3979 |
| aspC        | sp Q9X0Y2 AAT_THEMA Aspartate aminotransferase OS=Thermotoga maritima (strain ATCC 43589 / MSB8 / DSM 3109 / JCM 10099) GN=aspC PE=1 SV=1                                                        | 0.0000 | -1.3886 |
| Namu_4940   | tr C8XA14 C8XA14_NAKMY Rhodanese domain protein OS=Nakamurella multipartita (strain ATCC 700099 / DSM 44233 / JCM 9543 / Y-104) GN=Namu_4940 PE=4 SV=1                                           | 0.0000 | -1.3597 |
| motA        | sp Q44902 MOTA_BORBU Motility protein A OS=Borrelia burgdorferi (strain ATCC 35210 / B31 / CIP 102532 / DSM 4680) GN=motA PE=3 SV=2                                                              | 0.0000 | -1.3407 |



|           |                                                                                                                                                                                                                                               |        |         |
|-----------|-----------------------------------------------------------------------------------------------------------------------------------------------------------------------------------------------------------------------------------------------|--------|---------|
| fba       | sp Q9X8R6 ALF_STRCO Fructose-bisphosphate aldolase OS=Streptomyces coelicolor (strain ATCC BAA-471 / A3(2) / M145) GN=fba PE=3 SV=1                                                                                                           | 0.0000 | -1.3254 |
| fabH      | sp B2GFZ7 FABH_KOCD 3-oxoacyl-[acyl-carrier-protein] synthase 3 OS=Kocuria rhizophila (strain ATCC 9341 / DSM 348 / NBRC 103217 / DC2201) GN=fabH PE=3 SV=1                                                                                   | 0.0000 | -1.3238 |
| infB      | sp A1T7H8 IF2_MYCVP Translation initiation factor IF-2 OS=Mycobacterium vanbaalenii (strain DSM 7251 / PYR-1) GN=infB PE=3 SV=1                                                                                                               | 0.0000 | -1.3022 |
| dnaK      | sp C5C3P2 DNAK_BEUC1 Chaperone protein DnaK OS=Beutenbergia cavernae (strain ATCC BAA-8 / DSM 12333 / NBRC 16432) GN=dnaK PE=3 SV=1                                                                                                           | 0.0016 | -1.2784 |
| hisA      | sp A9WQA3 HIS4_RENSM 1-(5-phosphoribosyl)-5-[(5-phosphoribosylamino)methylideneamino] imidazole-4-carboxamide isomerase OS=Renibacterium salmoninarum (strain ATCC 33209 / DSM 20767 / JCM 11484 / NBRC 15589 / NCIMB 2235) GN=hisA PE=3 SV=1 | 0.0000 | -1.2676 |
| ftsZ      | sp P45499 FTSZ_KOCD Cell division protein FtsZ OS=Kocuria rhizophila (strain ATCC 9341 / DSM 348 / NBRC 103217 / DC2201) GN=ftsZ PE=3 SV=2                                                                                                    | 0.0000 | -1.2540 |
| kgd       | sp Q1B4V6 KGD_MYCSS Multifunctional 2-oxoglutarate metabolism enzyme OS=Mycobacterium sp. (strain MCS) GN=kgd PE=3 SV=1                                                                                                                       | 0.0000 | -1.2438 |
| infB      | sp A1T7H8 IF2_MYCVP Translation initiation factor IF-2 OS=Mycobacterium vanbaalenii (strain DSM 7251 / PYR-1) GN=infB PE=3 SV=1                                                                                                               | 0.0000 | -1.2270 |
| SAV_4896  | sp Q82DS2 Y4896_STRAW UPF0234 protein SAV_4896 OS=Streptomyces avermitilis (strain ATCC 31267 / DSM 46492 / JCM 5070 / NCIMB 12804 / NRRL 8165 / MA-4680) GN=SAV_4896 PE=3 SV=1                                                               | 0.0000 | -1.2061 |
| topA      | sp Q9X909 TOP1_STRCO DNA topoisomerase 1 OS=Streptomyces coelicolor (strain ATCC BAA-471 / A3(2) / M145) GN=topA PE=3 SV=1                                                                                                                    | 0.0000 | -1.1939 |
| obg       | sp A0JXJ8 OBG_ARTS2 GTPase Obg OS=Arthrobacter sp. (strain FB24) GN=obg PE=3 SV=1                                                                                                                                                             | 0.0000 | -1.1911 |
| purH      | sp A1SMP8 PUR9_NOCJ Bifunctional purine biosynthesis protein PurH OS=Nocardioides sp. (strain BAA-499 / JS614) GN=purH PE=3 SV=1                                                                                                              | 0.0000 | -1.1897 |
| Achl_1089 | tr B8HE47 B8HE47_ARTCA Type III restriction protein res subunit OS=Arthrobacter chlorophenolicus (strain ATCC 700700 / DSM 12829 / JCM 12360 / NCIMB 13794 / A6) GN=Achl_1089 PE=4 SV=1                                                       | 0.0006 | -1.1841 |
| eno       | sp B2GM13 ENO_KOCD Enolase OS=Kocuria rhizophila (strain ATCC 9341 / DSM 348 / NBRC 103217 / DC2201) GN=eno PE=3 SV=1                                                                                                                         | 0.0000 | -1.1834 |
| garA      | sp A0QYG2 GARA_MYCS2 Glycogen accumulation regulator GarA OS=Mycobacterium smegmatis (strain ATCC 700084 / mc(2)155) GN=garA PE=1 SV=2                                                                                                        | 0.0001 | -1.1825 |

|                  |                                                                                                                                                                              |        |         |
|------------------|------------------------------------------------------------------------------------------------------------------------------------------------------------------------------|--------|---------|
| glnA             | sp P15106 GLNA_STRCO Glutamine synthetase OS=Streptomyces coelicolor (strain ATCC BAA-471 / A3(2) / M145) GN=glnA PE=2 SV=1                                                  | 0.0000 | -1.1749 |
| yrkF             | sp P54433 YRK_F_BACSU UPF0033 protein YrkF OS=Bacillus subtilis (strain 168) GN=yrkF PE=3 SV=1                                                                               | 0.0000 | -1.1582 |
| infB             | sp A9WPV8 IF2_RENSM Translation initiation factor IF-2 OS=Renibacterium salmoninarum (strain ATCC 33209 / DSM 20767 / JCM 11484 / NBRC 15589 / NCIMB 2235) GN=infB PE=3 SV=1 | 0.0001 | -1.1424 |
| carB             | sp Q9KXR6 CARB_STRCO Carbamoyl-phosphate synthase large chain OS=Streptomyces coelicolor (strain ATCC BAA-471 / A3(2) / M145) GN=carB PE=3 SV=1                              | 0.0000 | -1.1394 |
| Asphe3_18340     | tr F0MBQ7 F0MBQ7_ARTPP Methylmalonyl-CoA epimerase OS=Arthrobacter phenanthrenivorans (strain DSM 18606 / JCM 16027 / LMG 23796 / Sphe3) GN=Asphe3_18340 PE=4 SV=1           | 0.0000 | -1.1362 |
| BRPE67_ACDS23800 | tr A0A060P735 A0A060P735_9BURK Putative membrane protein OS=Burkholderia sp. RPE67 GN=BRPE67_ACDS23800 PE=4 SV=1                                                             | 0.0047 | -1.1130 |
| alaS             | sp A1R709 SYA_ARTAT Alanine--tRNA ligase OS=Arthrobacter aureus (strain TC1) GN=alaS PE=3 SV=2                                                                               | 0.0000 | -1.1086 |
| carB             | sp Q9KXR6 CARB_STRCO Carbamoyl-phosphate synthase large chain OS=Streptomyces coelicolor (strain ATCC BAA-471 / A3(2) / M145) GN=carB PE=3 SV=1                              | 0.0000 | -1.1040 |
| Achl_2575        | tr B8HCC4 B8HCC4_ARTCA Uncharacterized protein OS=Arthrobacter chlorophenolicus (strain ATCC 700700 / DSM 12829 / JCM 12360 / NCIMB 13794 / A6) GN=Achl_2575 PE=4 SV=1       | 0.0001 | -1.0962 |
| SSHG_00496       | tr D6B7C1 D6B7C1_9ACTO Retrotransposon protein OS=Streptomyces albus J1074 GN=SSHG_00496 PE=4 SV=1                                                                           | 0.0000 | -1.0914 |
| ftsZ             | sp P45499 FTSZ_KOCD Cell division protein FtsZ OS=Kocuria rhizophila (strain ATCC 9341 / DSM 348 / NBRC 103217 / DC2201) GN=ftsZ PE=3 SV=2                                   | 0.0000 | -1.0836 |
| Arth_1427        | tr A0JUV1 A0JUV1_ARTS2 HNH endonuclease OS=Arthrobacter sp. (strain FB24) GN=Arth_1427 PE=4 SV=1                                                                             | 0.0000 | -1.0767 |
| infB             | sp Q0I7K2 IF2_SYNS3 Translation initiation factor IF-2 OS=Synechococcus sp. (strain CC9311) GN=infB PE=3 SV=1                                                                | 0.0000 | -1.0691 |
| cin              | sp P21703 CIN_BPP7 DNA-invertase OS=Enterobacteria phage P7 GN=cin PE=3 SV=1                                                                                                 | 0.0000 | -1.0686 |
| alaS             | sp A1R709 SYA_ARTAT Alanine--tRNA ligase OS=Arthrobacter aureus (strain TC1) GN=alaS PE=3 SV=2                                                                               | 0.0000 | -1.0672 |
| nocP             | sp P35116 NOCP_AGRT5 Nopaline permease ATP-binding protein P OS=Agrobacterium tumefaciens (strain C58 / ATCC 33970) GN=nocP PE=3 SV=1                                        | 0.0000 | -1.0522 |
| purH             | sp A1SMP8 PUR9_NOCSJ Bifunctional purine biosynthesis protein PurH OS=Nocardioideus sp. (strain BAA-499 / JS614) GN=purH PE=3 SV=1                                           | 0.0000 | -1.0142 |
| bcp              | sp Q9ZHF0 BCP_BUCAP Putative peroxiredoxin bcp OS=Buchnera aphidicola subsp. Schizaphis graminum (strain Sg) GN=bcp PE=3 SV=2                                                | 0.0000 | -1.0002 |

|            |                                                                                                                                                           |        |         |
|------------|-----------------------------------------------------------------------------------------------------------------------------------------------------------|--------|---------|
| fadA       | sp Q5E8X7 FADA_VIBF1 3-ketoacyl-CoA thiolase OS=Vibrio fischeri (strain ATCC 700601 / ES114) GN=fadA PE=3 SV=2                                            | 0.0000 | -0.9922 |
| SPCC965.06 | sp O59826 KCAB_SCHPO Putative voltage-gated potassium channel subunit beta OS=Schizosaccharomyces pombe (strain 972 / ATCC 24843) GN=SPCC965.06 PE=3 SV=1 | 0.0000 | -0.9920 |
